1 **Epigenetic inactivation of miR-203 as a key step in**  
2 **neural crest epithelial-to-mesenchymal transition**

3 Estefanía Sánchez-Vásquez<sup>1</sup>, Marianne E. Bronner<sup>2</sup>, Pablo H. Strobl-Mazzulla<sup>1\*</sup>

4

5 <sup>1</sup>Laboratory of Developmental Biology, Instituto Tecnológico de Chascomús  
6 (CONICET-UNSAM), Chascomús 7130, Argentina

7 <sup>2</sup>Division of Biology 139-74, California Institute of Technology, Pasadena, CA  
8 91125

9 \* email: [strobl@intech.gov.ar](mailto:strobl@intech.gov.ar)

10 Correspondence should be addressed to PHS-M

11

12 Key words: EMT, neural crest, miR-203, Snail2, DNA methylation, Phf12,  
13 migration

14

15

16 **Summary statement**

17 The EMT is a highly conserved process, involving similar levels of regulation in  
18 both neural crest and cancer cells. Our work shows an epigenetic-miRNA-gene  
19 regulatory circuit, conserved in cancer, which controls the timing of neural crest  
20 EMT as well.

21

22 **Abstract**

23 miR-203 is a tumor-suppressor microRNA with known functions in cancer  
24 metastasis. Here, we explore its normal developmental role in the context of  
25 neural crest development. As neural crest cells undergo an epithelial-to-  
26 mesenchymal transition to emigrate from the neural tube, miR-203 displays a  
27 reciprocal expression pattern with key regulators of neural crest delamination,  
28 *Phf12* and *Snail2*, and interacts with their 3'UTRs. Ectopic maintenance of miR-  
29 203 inhibits neural crest migration, whereas its functional inhibition using a  
30 “sponge” vector promotes premature neural crest delamination. Bisulfite  
31 sequencing further shows that epigenetic repression of miR-203 is mediated by  
32 the *de novo* DNA methyltransferase DNMT3B, whose recruitment to regulatory  
33 regions on the miR-203 locus is directed by SNAIL2 in a negative feedback  
34 loop. These findings reveal an important role for miR-203 in an epigenetic-  
35 microRNA regulatory network that influences the timing of neural crest  
36 delamination.

37

38

39

40

## 41 **Introduction**

42 Neural crest cells (NCC) are a transient embryonic cell population that arise in  
43 the neuroectoderm, then migrate to the periphery where they contribute to  
44 diverse derivatives including craniofacial bone and cartilage, neurons and glia of  
45 the peripheral nervous system, pigment cells, and portions of the cardiovascular  
46 system (Crane and Trainor, 2006). NCC emigrate from the forming central  
47 nervous system by undergoing an epithelial-mesenchymal transition (EMT),  
48 similar to that observed during initiation of tumor metastasis (Kerosuo and  
49 Bronner-Fraser, 2012). An evolutionarily conserved gene regulatory network  
50 (GRN) regulates NCC EMT and depends upon the coordinated action of  
51 transcription factors including *Snail1/2*, *Zeb2 (Sip1)*, and *FoxD3* (Simoës-Costa  
52 and Bronner, 2015). In addition to transcriptional regulators mediating neural  
53 crest EMT, epigenetic mechanisms including DNA methylation (Hu et al., 2012,  
54 Hu et al., 2014) and histone modifications (Strobl-Mazzulla and Bronner, 2012,  
55 Strobl-Mazzulla et al., 2010) are also at play. In particular, a repressor complex,  
56 comprised of SNAIL2 and the epigenetic reader PHF12 represses *cadherin 6b*  
57 (*Cad6b*) (Strobl-Mazzulla and Bronner, 2012), whose down-regulation is  
58 required for initiation of neural crest delamination from the neural tube. These  
59 results demonstrate an additional level of fine tuning and important role for  
60 epigenetic regulators during neural crest EMT, raising the intriguing possibility  
61 that other yet to be identified factors may be involved.

62 In recent years, microRNAs (miRNAs) have been shown to be key regulators of  
63 EMT in several tumor cells (Diaz-Lopez et al., 2014, Ding, 2014, Xia and Hui,  
64 2012). MicroRNAs are ~22-nucleotides single-stranded RNAs that negatively  
65 regulate gene expression post-transcriptionally (Kloosterman and Plasterk,

66 2006) by inhibiting translation and/or causing degradation by binding to  
67 complementary sequences located at the 3'-untranslated region (3'-UTR) of  
68 target mRNAs. Approximately 50% of miRNAs genes are embedded or  
69 associated with CpGs islands, and their expression is most often regulated by  
70 methylation of cytosines therein (Weber et al., 2007). In several tumor cells, it  
71 has been shown that hypermethylation of anti-tumoral miRNAs leads to  
72 initiation of EMT (Ahmad et al., 2014, Kiesslich et al., 2013, Lujambio et al.,  
73 2008, Wang et al., 2012, Bonnomet et al., 2010, Diaz-Lopez et al., 2014, Ding,  
74 2014, Nelson and Weiss, 2008, Xia and Hui, 2012). The commonalities  
75 between the migration of cancer cells and embryonic neural crest cells (Mayor  
76 and Theveneau, 2013, Scarpa and Mayor, 2016, Friedl and Gilmour, 2009)  
77 suggest the intriguing possibility that similar epigenetic-microRNA to those  
78 functioning in metastasis may be involved in NCC development. As case in  
79 point, we describe in avian embryos that the epigenetic repression of miR-203,  
80 directed by SNAIL2 enables upregulation of two of its direct targets, *Phf12* and  
81 *Snail2*, necessary for the delamination of the neural crest from the neural tube.  
82 These findings support the idea that a single microRNA, regulating key genes of  
83 the EMT process, may “throw” a precise switch mediating an epithelial to a  
84 mesenchymal state of neural crest cells.

## 85 **Results**

### 86 *miR-203 expression is reduced at the time of NCC delamination*

87 Given that *Phf12* and *Snail2* are involved in regulation of NCC EMT (Strobl-  
88 Mazzulla and Bronner, 2012), we performed an *in silico* and literature analysis  
89 to investigate miRNAs that might regulate these transcription factors.  
90 Interestingly, we found 9 and 7 families, respectively, of miRNAs in the 3'UTRs

91 of *Phf12* and *Snail2* with sites conserved across vertebrates (Table S1). Based  
92 on its their reported functionality, demonstrated target genes and expression  
93 pattern during chick development (Darnell et al., 2006), we further focused on  
94 miR-203 for in depth analysis. Importantly, miR-203 has been described to act  
95 as tumor suppressor (Benaich et al., 2014, Miao et al., 2014, Zhu et al., 2013b),  
96 that directly regulates *Snail2* expression (Gao et al., 2017, Shi et al., 2015,  
97 Zhang et al., 2015, Xiao et al., 2017), whose epigenetic repression causes  
98 metastasis in several tumor cells including NCC-derived melanoma (Boldrup et  
99 al., 2012, Boll et al., 2013, Chen et al., 2012, Chiang et al., 2011, Ding et al.,  
100 2013, Furuta et al., 2010, Huang et al., 2014, Ju et al., 2014, Moes et al., 2012,  
101 Zhang et al., 2014, Zhao et al., 2013, Bu and Yang, 2014, Lohcharoenkal et al.,  
102 2018). Moreover, the mature miR-203 sequence is highly conserved throughout  
103 vertebrates including the basal lamprey (Fig. 1B), suggesting an ancient and  
104 conserved function.

105 As a first step in analyzing its possible function during NCC development, we  
106 examined the expression pattern of miR-203 transcripts by *in situ* hybridization  
107 (ISH) in early chick embryos. By using LNA-DIG labelled probes, we found that  
108 mature miR-203 expression begins during gastrulation by stage 4 (Fig. S1A).  
109 During neurulation at the 1-4 somite stage (ss), miR-203 is consistently  
110 expressed in the forming neural tube (Fig. 1A). Interestingly, we observed a  
111 clear reduction by the 5 to 8ss in the miR-203 expression in the cranial neural  
112 tube, corresponding to the initiation of neural crest emigration. Analyses by  
113 stem-loop RT-qPCR confirmed that mature miR-203 expression is reduced from  
114 5 to 6ss, coincident with the increase of *Snail2* and *Phf12* expression at the time

115 of NCC delamination (Fig. 1C). These results are consistent with the intriguing  
 116 possibility that miR-203 has an important role in neural crest EMT.

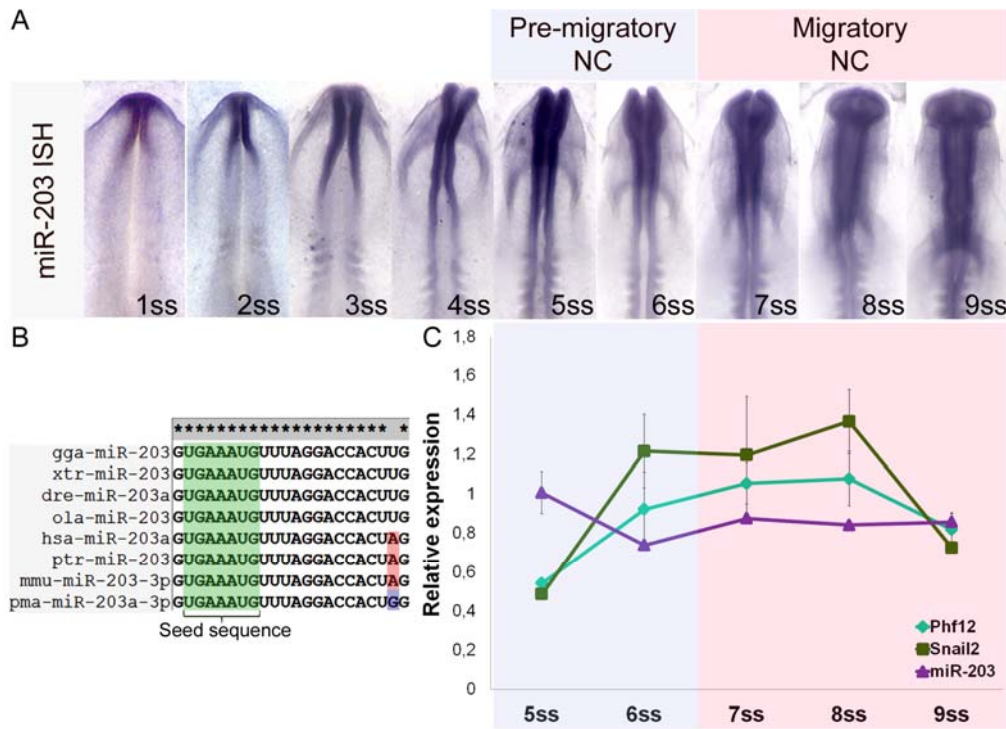

117  
 118 **Figure 1: miR-203 expression is reduced at the time of NCC delamination.** (A) Whole-  
 119 mount *in situ* hybridization (ISH) using LNA-DIG labelled probes reveals a specific expression of  
 120 the mature miR-203 on the neural tube which is reduced from 5 somite stage (ss) to 9ss. (B)  
 121 Conservation analysis of miR-203 in vertebrates. Gga (*Gallus gallus*), xtr (*Xenopus tropicalis*),  
 122 dre (*Danio rerio*), ola (*Oryzias latipes*), hsa (*Homo sapiens*), ptr (*Pan troglodytes*), mmu (*Mus*  
 123 *musculus*), pma (*Petromyzon marinus*). (C) RT-qPCR analyses show reducing miR-203  
 124 expression from 5 to 6ss in an opposite manner than the observed increase on *Snail2* and  
 125 *Phf12* expression at the beginning of NCC delamination.

126

127

128

129

130 *miR-203 locus is highly methylated on pre-migratory NCC*

131 In several metastatic tumor cells, the miR-203 locus is epigenetically silenced  
132 by DNA methylation (Chim et al., 2011a, Chim et al., 2011b, Diao et al., 2014,  
133 Furuta et al., 2010, Huang et al., 2014, Taube et al., 2013, Zhang et al., 2013,  
134 Zhang et al., 2011). Interestingly, we found by *in silico* analysis that the miR-203  
135 locus is embedded in a CpG island (Fig. 2A). On this basis, we selected two  
136 genomic regions, one at the putative proximal promoter (region 1) and the other  
137 at the beginning of the pri-miR-203 (region 2), to analyze the DNA methylation  
138 abundance on pre-migratory (PM-NCC) or migratory (M-NCC) neural crest cells  
139 and the ventral neural tube (NT). By using bisulfite conversion, we observed  
140 high enrichment on methylated CpGs in region 2, but not on region 1, in the  
141 PM-NCC compared with the low abundance detected on the M-NCC and NT  
142 (Fig. 2B-C). These significant differences are clearly evident when comparing  
143 the total percentage of methylated CpGs (Fig. 2D-E) from the different samples.  
144 We identified that 18.4% and 28.9% of the CpGs are methylated on region 1  
145 and 2 on PM-NCC, compared with 9.5% and 6.1% on the NT, and 5.3% and 7%  
146 detected on the M-NCC, respectively. These results suggest that the decreased  
147 expression of miR-203 in pre-migratory NC may be the consequence of  
148 hypermethylation of its locus.

149

#### 150 *DNMT3B and SNAIL2 are required for miR-203 methylation*

151 *De novo* DNA methyltransferases DNMT3A and 3B are both involved in neural  
152 crest development (Hu et al., 2012). To examine the possibility that DNA  
153 methylation may be involved in regulating miR-203 expression, we examined  
154 the effects of loss of DNMT3A and 3B on miR-203 expression. To this end, we  
155 performed bisulfite sequencing after loss of function experiments with previously  
156 characterized fluorescein-tagged morpholino oligonucleotides, DNMT3A-MO

157 and DNMT3B-MO (Hu et al., 2012, Hu et al., 2014). After unilateral injection and  
158 electroporation, dorsal neural tubes from 6ss embryos were dissected and  
159 bisulfite converted to analyze the methylation abundance on region 2 of miR-  
160 203 locus (Fig. 2A). The results show that loss of function of either of the two  
161 DNMTs consistently decreases the abundance of methylated CpGs in the  
162 region 2 (Fig. 2F). However, depletion of DNMT3B, but not DNMT3A, resulted  
163 in significant differences in methylation of miR-203.

164 Transcription factors specifically bind to target DNAs to recruit and guide DNA  
165 methyltransferases to specific genomic sites (Siegfried and Simon, 2010).  
166 During tumor metastasis, SNAIL2 binds to the miR-203 promoter to inhibit its  
167 transcription (Ding et al., 2013), though the mechanism underlying this  
168 repression is unknown. Our bioinformatic analysis reveal several SNAIL2-  
169 binding sites ~1kb upstream of the pre-miR-203 (Fig. 2A, Table S2), two of  
170 which have a high binding score (>9) accordingly to JASPAR 2018  
171 (<http://jaspar.genereg.net/>). To test the effects of SNAIL2 loss of function, we  
172 electroporated a previously characterized Snail2 morpholino (Snail2-MO)  
173 (Taneyhill et al., 2007) unilaterally and dissected half dorsal neural tubes from  
174 6ss embryos for analysis of miR-203 expression and DNA methylation.  
175 Interestingly, the results show that Snail2 knockdown causes a significant  
176 upregulation of miR-203 expression (Fig. 2G). Consistent with this finding, we  
177 found a significant reduction in the abundance of methylated CpGs in region 2  
178 of the miR-203 locus (Fig. 2H). These results suggest that SNAIL2 is involved in  
179 the epigenetic repression of miR-203 in the premigratory neural crest.



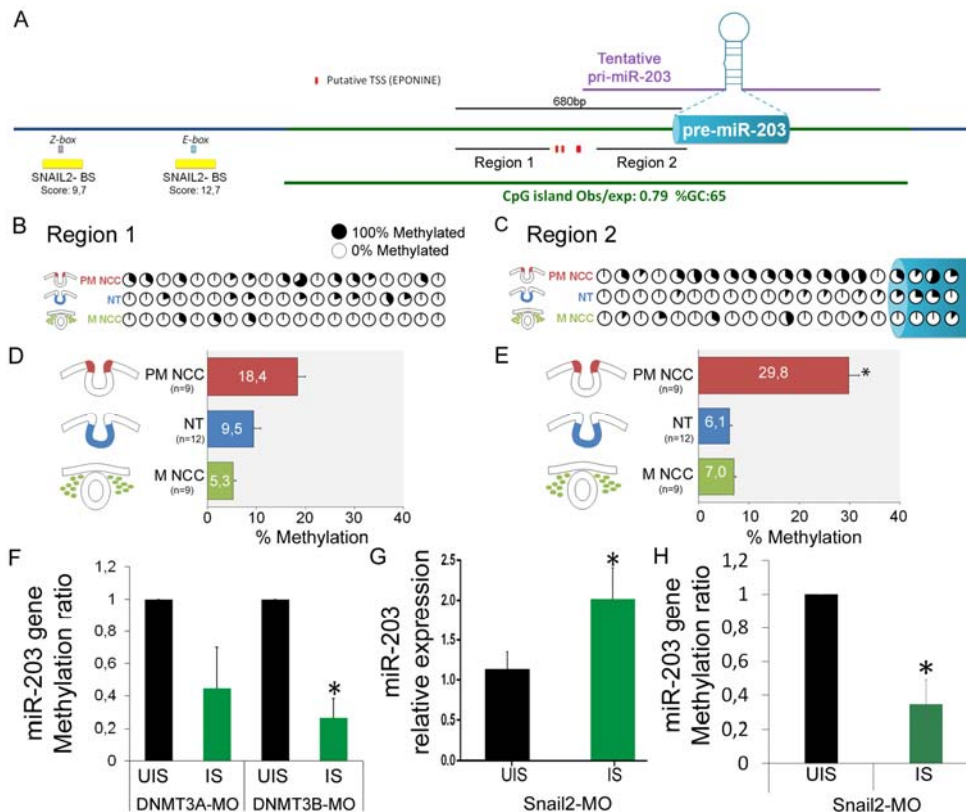

180

181 **Figure 2: *SNAIL2* and *DNMT3B* are required for DNA methylation on miR-203 locus on**  
 182 **premigratory NCC.** (A) miR-203 genomic context. The CpG island content (green bar) for miR-

183 203 gene was identified using the UCSC genome browser (<https://genome.ucsc.edu/>) and

184 Ensembl (<http://www.ensembl.org/>). The putative transcriptional start sites (TSS) were obtained

185 using Eponine (<https://www.sanger.ac.uk/science/tools/eponine>). The putative binding sites for

186 *SNAIL2* were mapped using JASPAR 2018 (<http://jaspar.genereg.net/>). We also show the two

187 regions used in our bisulfite sequencing and the pre-miR-203 accordingly to the miRbase

188 (<http://www.mirbase.org/>). Bisulfite sequencing profiles of CpGs methylation on the region 1 (B)

189 and region 2 (C) were analyzed on pre-migratory NCC (PM-NCC), migratory NCC (M-NC), and

190 ventral neural tube (NT). Percentage of each methylated CpG sites are shown with filled (100%

191 methylated) and open (0% methylated) circles. Bar graph represent the total percentages of

192 methylated CpGs on the different regions for the three analyzed samples on the region 1 (D)

193 and the region 2 (E). We evidenced in PM-NCC a higher percentage of methylated CpGs

194 compared with the other samples. Number in brackets indicated the analyzed sequences.

195 Asterisk (\*) indicate significant differences by ANOVA. (F) Morpholino-mediated loss of

196 *DNMT3A* (*DNMT3A-MO*) and *DNMT3B* (*DNMT3B-MO*) function results in a reduction of

197 methylated CpGs on the injected side (IS) compared with the uninjected side (UIS) of the same  
198 group of embryos. Morpholino-mediated loss of SNAIL2 (SNAIL2-MO) function maintains an  
199 elevated level of miR-203 expression (G) and reduced CpGs methylation on the region 2 (H) on  
200 the IS compared with the UIS of the same group of embryos. Asterisk (\*) indicate significant  
201 differences by Student's *t*-test.

202

### 203 *Overexpression of miR-203 causes loss of migrating NCC*

204 Since miR-203 expression is epigenetically repressed at the initiation of their  
205 migration, we asked whether maintenance of miR-203 expression would  
206 prevent neural crest delamination. To this end, we designed an overexpression  
207 vector in which we cloned the pre-miR-203 sequence, plus a few hundred base  
208 pair arms for correct processing, under the control of CAG promoter (pCAG-  
209 203) (Fig. 3A). Overexpression of miR-203 in pCAG-miR-203 electroporated  
210 embryos was confirmed by LNA-ISH (Fig. S2B). To demonstrate that the pCAG-  
211 miR-203 expresses a functional miR-203, we first used a two-colored sensor  
212 vector (Cao et al., 2007) comprised of a nuclear-localized destabilized EGFP  
213 with a half-life of 4 hours (d4EGFP<sub>N</sub>), driven by a CAG promoter, followed by a  
214 3'UTR containing two copies of a bulged complementary sequence for miR-203.  
215 In addition, the vector contains a nuclear-localized monomeric red fluorescent  
216 protein (mRFP<sub>N</sub>) driven by another CAG promoter that serves as an  
217 electroporation control (see scheme of pSdmiR-203 in figure S2C). Together  
218 with the dual sensor pSdmiR-203, we co-electroporated either control empty  
219 vector (left) or the vector expressing miR-203 (right) onto each side of the  
220 embryo (Fig. S2D). The results show that on the control side, most of the  
221 electroporated cells appeared yellow, due to expression of d4EGFP<sub>N</sub> and  
222 mRFP<sub>N</sub>. However, on the experimental side, overexpression of miR-203 causes

223 a strong reduction of d4EGFP<sub>N</sub> and the cells only express mRFP<sub>N</sub> (Fig. S2E).  
224 These results confirm the functionality of our miR-203 expression construct.  
225 Gain-of-function experiments were conducted by electroporating the miR-203  
226 vector on one side of the embryo (Fig. S2A). The results show that miR-203  
227 overexpression causes a drastic reduction in the numbers of migratory neural  
228 crest cells identified by *Sox10* expression (Fig. 3B). By categorizing embryos  
229 according to their phenotype (normal or reduced migratory NCC), we observed  
230 a significant increase in the number of embryos with a reduced number of  
231 migratory NCC on pCAG-203 electroporated side compared with control  
232 embryos electroporated with an empty vector (pCAG) (Fig. 3C). To rule out the  
233 possibility that this may be secondary to a specification defect, we analyzed the  
234 expression of early neural crest specifier genes by immunohistochemistry at  
235 pre-migratory stages. Interestingly, our results demonstrate that overexpression  
236 of miR-203 does not affect expression of FOXD3, one of earliest neural crest  
237 specification markers (Fig. 3D), suggesting that specification occurs normally. In  
238 contrast, there was a clear reduction in SNAIL2, demonstrating reciprocal  
239 repression. Taken together, our results highlight the role of miR-203 in NCC  
240 delamination, likely by affecting EMT inducers like SNAIL2.

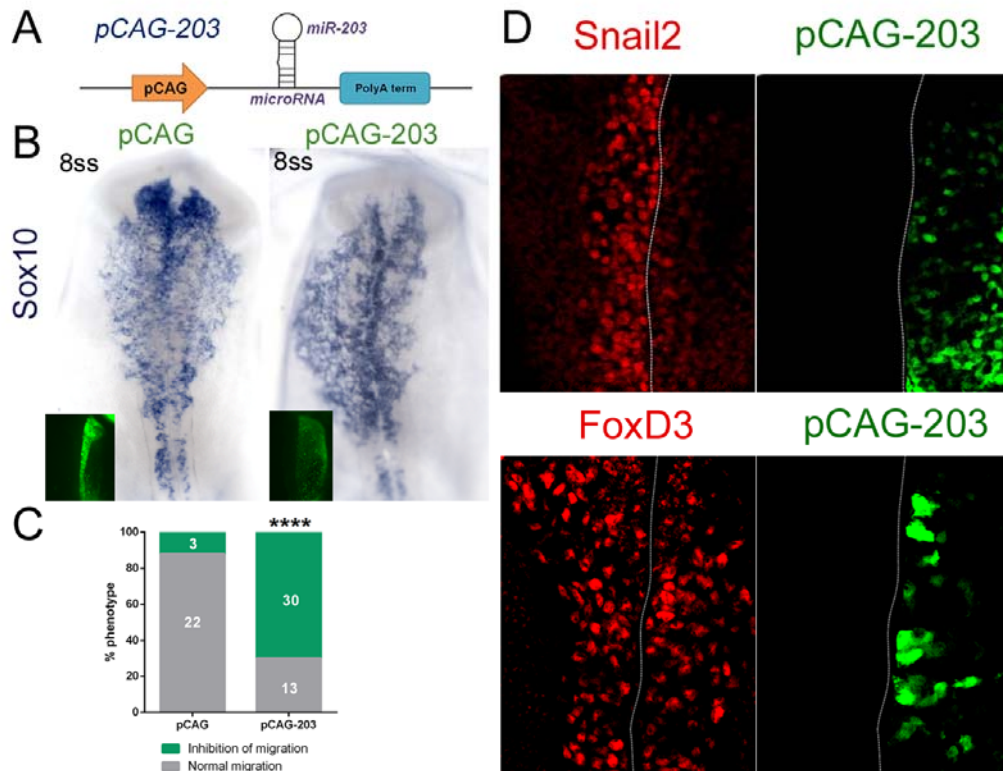

241

242 **Figure 3: miR-203 overexpression prevents NCC delamination without affecting**  
243 **specification.** (A) Scheme of pCAG-203 vector to overexpress miR-203. (B) *In situ*  
244 hybridization for Sox10 showed inhibition of NCC migration in the pCAG-203 injected side, in  
245 comparison with the uninjected side of the same embryos and with embryos injected with an  
246 empty pCAG vector. (C) Quantitation of the embryos according to their phenotypes (normal  
247 migration versus inhibition of migration) was analyzed. Numbers in the graphs represent the  
248 numbers of analyzed embryos. \*\*\*\*P < 0,0001 by contingency table followed by X<sup>2</sup> test. (D)  
249 Immunohistochemistry analyzes on miR-203 overexpressing embryos evidenced a reduced  
250 expression of SNAIL2 but does not affect the expression of the early NCC specifier FOXD3.

251

### 252 *Loss of miR-203 function causes premature NCC delamination*

253 Given that miR-203 is epigenetically repressed in pre-migratory NCC and  
254 overexpression of miR-203 causes defect in their delamination, we next asked if  
255 early loss of miR-203 function would result in premature neural crest

256 delamination. To test this possibility we adapted a protocol (Kluiver et al., 2012)  
257 to generate a “sponge” vector containing repeated miR-203 antisense  
258 sequences (pSmiR-203) to sequester endogenous miR-203 (Fig. 4A). A sponge  
259 vector containing a scrambled sequence (pSmiR-scramble) was designed as a  
260 control. As predicted, electroporation of pSmiR-203 resulted in premature NCC  
261 migration, when compared with the contralateral uninjected side, analyzed by  
262 immunohistochemistry for SNAIL2 and FOXD3, or by ISH for *Sox10* (Fig. 4B).  
263 Importantly, no difference in timing of delamination was observed after  
264 electroporation of the pSmiR-scramble. By categorizing embryos according to  
265 their phenotype, premature versus normal migration, we observed a significant  
266 difference in percentage of embryos exhibiting premature NCC migration in  
267 pSmiR-203 electroporated embryos (Fig. 4C). Notably, reduction of miR-203  
268 function altered not only initiation of NCC delamination, but also shortened the  
269 overall length of time during which delamination occurred (Fig. 4D-D’). This is  
270 based on the observation that on the side injected with pSmiR-203, all the  
271 *Sox10*<sup>+</sup> NCCs have completed their delamination, compared with the  
272 contralateral side where many premigratory neural crest cells still persist on the  
273 dorsal neural tube. These results clearly confirm that miR-203 controls the  
274 temporal regulation of NCC delamination.

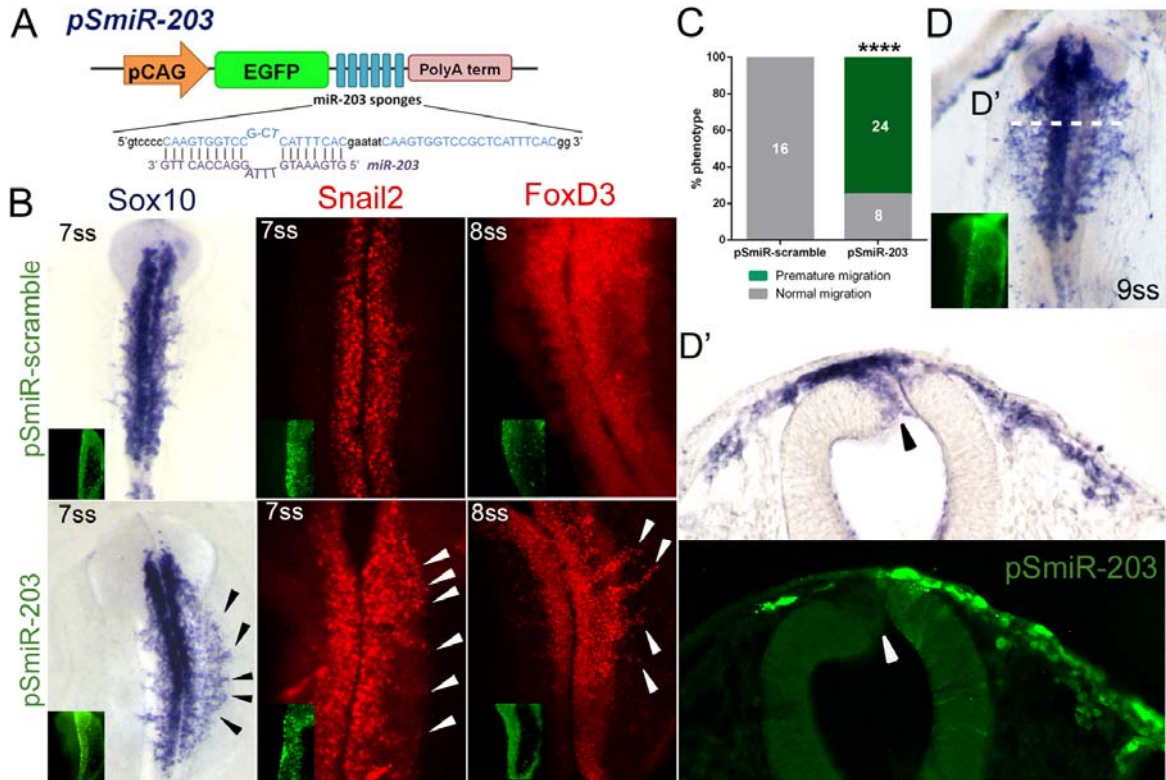

275

276 **Figure 4: miR-203 sponge vector causes premature NCC delamination.** (A) Scheme of  
 277 pSmiR-203 sponge vector having a bulged miR-203 antisense sequences downstream of the  
 278 EGFP reporter. (B) Electroporated embryos with pSmiR-203 causes premature migration of  
 279 NCC evidenced by *in situ* hybridization for Sox10 and immunohistochemistry for SNAIL2 and  
 280 FOXD3, and compared with the uninjected side of the same embryos or injected with pSmiR-  
 281 scramble vector. Arrowhead indicated premature migratory neural crest cells. (C) Quantitation of  
 282 pSmiR-203 or pSmiR-scramble treated embryos according to the observation of premature  
 283 NCC migration. Numbers in the graph represent the analyzed embryos. \*\*\*\*P<0,0001 by  
 284 contingency table followed by  $\chi^2$  test. (D-D') Neural crest cells from the sponge injected site  
 285 complete their delamination in advance compare with the uninjected site where many Sox10  
 286 expressing cells are still on the neural tube (see black arrowhead).

287

288 *miR-203 targets the 3'UTRs of Snail2 and Phf12*

289 To test whether *Snail2* and *Phf12* genes are direct targets of miR-203, we  
 290 designed two-colored sensor vectors in which we cloned, downstream of the



291 pCAG and d4EGFP<sub>N</sub>, the 3'UTRs containing the wild (pUTR-Snail2/Phf12) or  
 292 mutated (pUTR-mutSnail2/Phf12) miR-203 binding sites (Fig. 5A). Co-  
 293 electroporation of these vectors (Fig. 5B) demonstrated that overexpression of  
 294 miR-203 specifically inhibited d4EGFP<sub>N</sub> expression when it was fused to the  
 295 3'UTRs of *Snail2* and *Phf12* but was uniformly distributed when miR-203  
 296 binding sites were mutated (Fig. 5C-D). These results confirm that *Snail2* and  
 297 *Phf12* are endogenous targets of the same microRNA, miR-203.

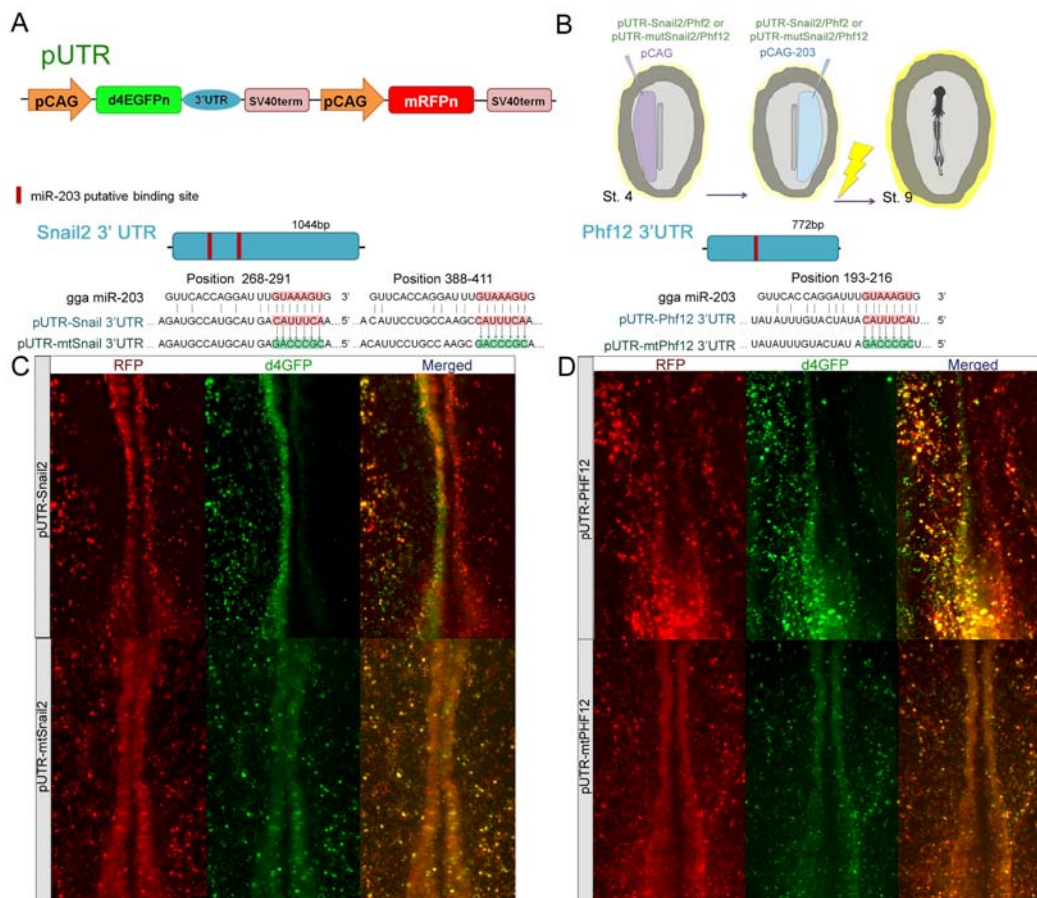

298

299 **Figure 5: *Snail2* and *Phf12* 3'UTRs are direct targets of miR-203.** (A) Scheme of dual  
 300 colored sensor vector containing wild or mutated (mt) 3'UTRs from *Snail2* (pUTR-Snail2) and  
 301 *Phf12* (pUTR-Phf12). pCAG, Chick  $\beta$ -actin promoter; d4EGFP<sub>N</sub> nuclear-localized destabilized  
 302 EGFP with a half-life of 4 h; mRFP<sub>N</sub>, nuclear-localized monomeric red fluorescent protein. (B)  
 303 Diagram of electroporation assays for 3'UTR-sensor experiments. Electroporation of sensor

304 vector containing the 3'UTRs for (C) *Snail2* (pUTR-Snail2) or (D) *Phf12* (pUTR-Phf12) together  
305 with miR-203 overexpressing vector (pCAG-203) causes a consistent reduction on the  
306 d4EGFP<sub>N</sub> expression (right side) compared with the control side (left side). Mutation of miR-  
307 203-binding sites in the 3'UTRs of *Snail2* (pUTR-mtSnail2) or *Phf12* (pUTR-mtPhf12) caused  
308 that most of the electroporated cells were yellow, expressing both d4EGFP<sub>N</sub> and mRFP<sub>N</sub>, even  
309 when miR-203 is overexpressed (right side).

310

## 311 **Discussion**

312 There is accumulating evidence for the importance of microRNAs in normal  
313 development as well as in several diseases, including tumor metastasis. Our  
314 study highlights the key role of a single microRNA, miR-203, in regulating the  
315 timing to initiation of the EMT program in neural crest cells. The results show  
316 that repression of miR-203 occurs via high levels of DNA methylation of the  
317 miR-203 locus by the DNMT3B, whose specific activity is directed by SNAIL2.  
318 In this scenario, repression of miR-203 is directed by SNAIL2 in a feedback-  
319 loop that enables expression of two direct targets of miR-203, *Phf12* and *Snail2*,  
320 which in turn are necessary for neural crest delamination. Finally, miR-203 gain-  
321 and loss-of-function cause reduction or premature NCC delamination,  
322 respectively. Taken together, the results reveal for the first time an epigenetic-  
323 miRNA-gene regulatory circuit that controls the timing of neural crest  
324 delamination (Fig. 6A). These findings support the idea that a single microRNA  
325 may “throw the switch” from an epithelial to a mesenchymal state in the neural  
326 crest and thus stabilize the core gene regulatory networks in these two states.  
327 There is increasing evidence to suggest that miRNAs often act as fine-tuning  
328 regulators rather than as primary gene regulators (Hornstein and Shomron,  
329 2006). Accordingly, we postulate that miR-203 may act by shifting the levels of



330 SNAIL2 and PHF12 to prevent premature NCC delamination. A similar  
331 epigenetic-miRNA control of the core transcription factors necessary for EMT  
332 (EMT-TFs) has been also described in cancer cells (Wright et al., 2010, Guttilla  
333 et al., 2012, Xia and Hui, 2012, Kiesslich et al., 2013, Ding, 2014). Interestingly,  
334 some miRNAs and EMT-TFs form a tightly interconnected feedback loop that  
335 controls epithelial cell plasticity (Moes et al., 2012, Ding, 2014, Wellner et al.,  
336 2009), similar to our observation that SNAIL2 directs the epigenetic repression  
337 of miR-203. These feedback-loops provide self-reinforcing signals and  
338 robustness to maintain the epithelial or mesenchymal cell state in response to  
339 different environmental cues. miR-203 is highly conserved from lamprey to  
340 human and appears to be an evolutionary novelty in vertebrates (Heimberg et  
341 al., 2010). Our data demonstrate that miR-203 is a key regulator of NCC  
342 delamination by a reversible epigenetic-miRNAs. Given that the EMT program  
343 is a highly conserved process, involving similar transcription factors in both  
344 embryonic and cancer cells, these finding open new avenues for understanding  
345 normal and pathological development, as well as tumor metastasis.

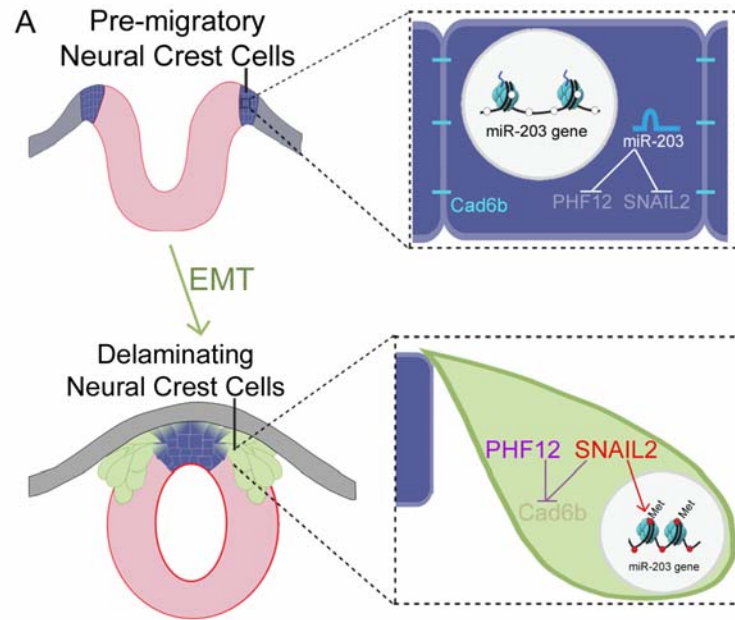

346

347 **Figure 6: Hypothetical model.** Our results show that during NCC specification, miR-203 is  
348 highly expressed and preventing the initial accumulation of SNAIL2 and PHF12. Previous to  
349 NCC delamination, the accumulation of SNAIL2 causes the epigenetic silencing, mediated by  
350 DNMT3B, of miR-203. Then, the lack of miR-203 allows a rapid upregulation of both *Snail2* and  
351 *phd12* at the same time, which are necessities for *Cad6b* repression at the beginning of the  
352 NCC epithelial-to-mesenchymal transition.

353

## 354 **Materials and methods**

### 355 *RNA preparation and RT-qPCR*

356 RNA was prepared from individual embryos (n=6) using the isolation kit  
357 RNAqueous-Micro (Ambion) following the manufacturer's instruction. The RNA  
358 was treated with amplification grade DNaseI (Invitrogen) and then reversed  
359 transcribed to cDNA with a reverse transcription kit (SuperScript II; Invitrogen)  
360 using stem-loop-miRNA-specifics (Chen et al., 2005) primers and random  
361 hexamers. QPCRs were performed using a 96-well plate qPCR machine  
362 (Stratagen) with SYBR green with ROX (Roche). Normalization controls genes

363 for qPCR were: for miR-203, miR-16 (Lardizabal et al., 2012) and for *Snail2* and  
364 *Phf12*, *Hprt1* (Simoes-Costa and Bronner, 2016). For a complete list of primer  
365 see table S3.

366

### 367 *Bisulfite sequencing*

368 Samples were obtained by dissecting of 9 embryos at stage 6ss, for  
369 premigratory NCC (PM-NCC), dorsal neural tube, and ventral neural tube (NT).  
370 In addition, we dissected 13 embryos at stage 11-13ss to obtain the migratory  
371 NCC (M-NCC). For the morpholino-mediated loss of DNMT3A, DNMT3B and  
372 SNAIL2 experiment, eight dorsal neural tubes from the injected and uninjected  
373 sides were dissected. For a complete list of morpholinos see table S3. All the  
374 tissues were lysed and bisulfite-converted with the EpiTect Plus Bisulfite  
375 Conversion Kit (Qiagen) following the manufacturer's instructions. The  
376 regulatory regions of miR-203 were amplified by using two sets of nested  
377 primers (see table S3) from the bisulfite-converted DNA. The obtained products  
378 were gel-purified and cloned into the pGEM-T Easy Vector (Promega).  
379 Individual clones were sequenced and analyzed.

380

### 381 *Electroporation*

382 Chicken embryos were electroporated at stage 4-5 using previously described  
383 techniques (Sauka-Spengler and Barembaum, 2008). The vectors and  
384 morpholinos were injected by air pressure using a glass micropipette and  
385 platinum electrodes were placed vertically across the chick embryos and  
386 electroporated with five pulses of 5.5 V for 50 ms at 100 ms intervals. Embryos  
387 were cultured in 0.5 ml albumen in tissue-culture dishes until the desired

388 stages. Embryos were then removed and fixed in 4% PFA and used for  
389 immunohistochemistry or *in situ* hybridization.

390

#### 391 *In situ hybridization*

392 Whole-mount chick *in situ* hybridization for mRNAs and for microRNA was  
393 performed as described previously (Acloque et al., 2008, Darnell et al., 2006).  
394 LNA probe for miR-203 used in the assay were obtained from Exiqon and DIG-  
395 labelled by using the DIG oligonucleotide 3' end labeling kit (Roche). After ISH,  
396 some embryos were fixed in 4% PFA in PBS, washed, embedded in gelatin,  
397 and cryostat sectioned at a thickness of 14–16  $\mu\text{m}$ . They were photographed  
398 using the NIS-Elements Advanced Research software (Nikon) with an Eclipse  
399 E600 microscope (Nikon) and processed using Photoshop CS3 (Adobe).

400

#### 401 *Immunohistochemistry*

402 Whole-mount chick immunohistochemistry was performed as described  
403 previously (Taneyhill et al., 2007). Briefly, embryos were fixed for 15 min in 4%  
404 PFA and then permeabilized and blocked in TBS (500 mM Tris-HCl, pH 7.4, 1.5  
405 M NaCl, and 10 mM  $\text{CaCl}_2$ ) containing 0.1% Triton X-100 (TBS-T) and 5% FBS  
406 for 60 min at room temperature. Primary antibodies were diluted in TBS-T/FBS  
407 and incubated overnight at 4°C. Primary antibodies used were mouse anti-  
408 Snail2 (1:100), (1:100; supplied by the Developmental Studies Hybridoma  
409 Bank), and rabbit anti-FoxD3 (1:300; gift of P. Labosky, Vanderbilt University  
410 Medical Center, Nashville, TN). Secondary antibodies used were goat anti-  
411 mouse and anti-rabbit Alexa Fluor 594 (1:500; all obtained from Molecular  
412 Probes) diluted in TBS-T/FBS and incubated for 45 min at room temperature.

413 All washes were performed in TBS-T at room temperature. Some embryos were  
414 subsequently embedded in gelatin, cryostat sectioned at 12-16 $\mu$ m,  
415 photographed using the NIS-Elements Advanced Research software (Nikon)  
416 with an Eclipse E600 microscope (Nikon) and processed using Photoshop CS3  
417 (Adobe).

418

#### 419 *MicroRNA sponge generation*

420 Oligos designed to generate miR-203 sponge were ordered phosphorylated and  
421 PAGE purified at a 100 nmol scale (see table S2) and dissolved to 50 mM in  
422 STE buffer (100 mM NaCl, 10 mM Tris/HCL, 1 mM EDTA, pH 8.0). Sense and  
423 antisense oligos were mixed at a 1:1 ratio and annealed by incubation at 100°C  
424 for 10 minutes followed by slow cooling. The “sponge” vector was generated  
425 following previously described protocols (Kluiver et al., 2012).

426

#### 427 **Acknowledgments**

428 We thank Dr. Xinwei Cao for the two-colored sensor vector, and Dr. Andrew  
429 Pollok for the advices on the design of sponge vector.

430 **Competing interests** The authors declare no conflicts of interest

#### 431 **Funding**

432 This work was supported by the Fogarty International Center of the NIH  
433 (R21TW011224 to MEB and PHS-M) and the Agencia Nacional de Promoción  
434 Científica y Tecnológica (PICT 2016-0747 to PHS-M).

#### 435 **Author contributions**

436 ESV, MEB and PHS-M conceived, designed and analyzed the experiments.

437 ESV performed all the experiments. ESV, MEB and PHS-M wrote the

438 manuscript.

439

## 440 **References**

- 441 Acloque, H., Wilkinson, D. G., & Nieto, M. A. (2008). In situ hybridization  
442 analysis of chick embryos in whole-mount and tissue sections. *Methods*  
443 *Cell Biol*, *87*, 169-185. doi: 10.1016/S0091-679X(08)00209-4
- 444 Ahmad, A., Li, Y., Bao, B., Kong, D., & Sarkar, F. H. (2014). Epigenetic  
445 regulation of miRNA-cancer stem cells nexus by nutraceuticals. *Mol Nutr*  
446 *Food Res*, *58*(1), 79-86. doi: 10.1002/mnfr.201300528
- 447 Benaich, N., Woodhouse, S., Goldie, S. J., Mishra, A., Quist, S. R., & Watt, F.  
448 M. (2014). Rewiring of an epithelial differentiation factor, miR-203, to  
449 inhibit human squamous cell carcinoma metastasis. *Cell Rep*, *9*(1), 104-  
450 117. doi: 10.1016/j.celrep.2014.08.062
- 451 Boldrup, L., Coates, P. J., Wahlgren, M., Laurell, G., & Nylander, K. (2012).  
452 Subsite-based alterations in miR-21, miR-125b, and miR-203 in  
453 squamous cell carcinoma of the oral cavity and correlation to important  
454 target proteins. *J Carcinog*, *11*, 18. doi: 10.4103/1477-3163.104007
- 455 Boll, K., Reiche, K., Kasack, K., Morbt, N., Kretschmar, A. K., Tomm, J. M., . . .  
456 Hackermuller, J. (2013). MiR-130a, miR-203 and miR-205 jointly repress  
457 key oncogenic pathways and are downregulated in prostate carcinoma.  
458 *Oncogene*, *32*(3), 277-285. doi: 10.1038/onc.2012.55
- 459 Bonnomet, A., Brysse, A., Tachsidis, A., Waltham, M., Thompson, E. W.,  
460 Polette, M., & Gilles, C. (2010). Epithelial-to-mesenchymal transitions  
461 and circulating tumor cells. *J Mammary Gland Biol Neoplasia*, *15*(2), 261-  
462 273. doi: 10.1007/s10911-010-9174-0
- 463 Bu, P., & Yang, P. (2014). MicroRNA-203 inhibits malignant melanoma cell  
464 migration by targeting versican. *Exp Ther Med*, *8*(1), 309-315. doi:  
465 10.3892/etm.2014.1708
- 466 Cao, X., Pfaff, S. L., & Gage, F. H. (2007). A functional study of miR-124 in the  
467 developing neural tube. *Genes Dev*, *21*(5), 531-536. doi:  
468 10.1101/gad.1519207
- 469 Crane, J. F., & Trainor, P. A. (2006). Neural crest stem and progenitor cells.  
470 *Annu Rev Cell Dev Biol*, *22*, 267-286. doi:  
471 10.1146/annurev.cellbio.22.010305.103814
- 472 Chen, C., Ridzon, D. A., Broomer, A. J., Zhou, Z., Lee, D. H., Nguyen, J. T., . . .  
473 Guegler, K. J. (2005). Real-time quantification of microRNAs by stem-  
474 loop RT-PCR. *Nucleic Acids Res*, *33*(20), e179. doi: 10.1093/nar/gni178
- 475 Chen, H. Y., Han, Z. B., Fan, J. W., Xia, J., Wu, J. Y., Qiu, G. Q., . . . Peng, Z.  
476 H. (2012). miR-203 expression predicts outcome after liver  
477 transplantation for hepatocellular carcinoma in cirrhotic liver. *Med Oncol*,  
478 *29*(3), 1859-1865. doi: 10.1007/s12032-011-0031-9
- 479 Chiang, Y., Song, Y., Wang, Z., Chen, Y., Yue, Z., Xu, H., . . . Liu, Z. (2011).  
480 Aberrant expression of miR-203 and its clinical significance in gastric and

- 481 colorectal cancers. *J Gastrointest Surg*, 15(1), 63-70. doi:  
482 10.1007/s11605-010-1367-8
- 483 Chim, C. S., Wan, T. S., Wong, K. Y., Fung, T. K., Drexler, H. G., & Wong, K. F.  
484 (2011). Methylation of miR-34a, miR-34b/c, miR-124-1 and miR-203 in  
485 Ph-negative myeloproliferative neoplasms. *J Transl Med*, 9, 197. doi:  
486 10.1186/1479-5876-9-197
- 487 Chim, C. S., Wong, K. Y., Leung, C. Y., Chung, L. P., Hui, P. K., Chan, S. Y., &  
488 Yu, L. (2011). Epigenetic inactivation of the hsa-miR-203 in  
489 haematological malignancies. *J Cell Mol Med*, 15(12), 2760-2767. doi:  
490 10.1111/j.1582-4934.2011.01274.x
- 491 Darnell, D. K., Kaur, S., Stanislaw, S., Konieczka, J. H., Yatskievych, T. A., &  
492 Antin, P. B. (2006). MicroRNA expression during chick embryo  
493 development. *Dev Dyn*, 235(11), 3156-3165. doi: 10.1002/dvdy.20956
- 494 Diao, Y., Guo, X., Jiang, L., Wang, G., Zhang, C., Wan, J., . . . Wu, Z. (2014).  
495 miR-203, a tumor suppressor frequently down-regulated by promoter  
496 hypermethylation in rhabdomyosarcoma. *J Biol Chem*, 289(1), 529-539.  
497 doi: 10.1074/jbc.M113.494716
- 498 Diaz-Lopez, A., Moreno-Bueno, G., & Cano, A. (2014). Role of microRNA in  
499 epithelial to mesenchymal transition and metastasis and clinical  
500 perspectives. *Cancer Manag Res*, 6, 205-216. doi:  
501 10.2147/CMAR.S38156
- 502 Ding, X., Park, S. I., McCauley, L. K., & Wang, C. Y. (2013). Signaling between  
503 transforming growth factor beta (TGF-beta) and transcription factor  
504 SNAI2 represses expression of microRNA miR-203 to promote epithelial-  
505 mesenchymal transition and tumor metastasis. *J Biol Chem*, 288(15),  
506 10241-10253. doi: 10.1074/jbc.M112.443655
- 507 Ding, X. M. (2014). MicroRNAs: regulators of cancer metastasis and epithelial-  
508 mesenchymal transition (EMT). *Chin J Cancer*, 33(3), 140-147. doi:  
509 10.5732/cjc.013.10094
- 510 Friedl, P., & Gilmour, D. (2009). Collective cell migration in morphogenesis,  
511 regeneration and cancer. *Nat Rev Mol Cell Biol*, 10(7), 445-457. doi:  
512 10.1038/nrm2720
- 513 Furuta, M., Kozaki, K. I., Tanaka, S., Arii, S., Imoto, I., & Inazawa, J. (2010).  
514 miR-124 and miR-203 are epigenetically silenced tumor-suppressive  
515 microRNAs in hepatocellular carcinoma. *Carcinogenesis*, 31(5), 766-776.  
516 doi: 10.1093/carcin/bgp250
- 517 Gao, P., Wang, S., Jing, F., Zhan, J., & Wang, Y. (2017). microRNA-203  
518 suppresses invasion of gastric cancer cells by targeting ERK1/2/Slug/ E-  
519 cadherin signaling. *Cancer Biomark*, 19(1), 11-20. doi: 10.3233/CBM-  
520 160167
- 521 Guttilla, I. K., Adams, B. D., & White, B. A. (2012). ERalpha, microRNAs, and  
522 the epithelial-mesenchymal transition in breast cancer. *Trends*  
523 *Endocrinol Metab*, 23(2), 73-82. doi: 10.1016/j.tem.2011.12.001
- 524 Heimberg, A. M., Cowper-Sal-lari, R., Semon, M., Donoghue, P. C., & Peterson,  
525 K. J. (2010). microRNAs reveal the interrelationships of hagfish,  
526 lampreys, and gnathostomes and the nature of the ancestral vertebrate.  
527 *Proc Natl Acad Sci U S A*, 107(45), 19379-19383. doi:  
528 10.1073/pnas.1010350107
- 529 Hornstein, E., & Shomron, N. (2006). Canalization of development by  
530 microRNAs. *Nat Genet*, 38 Suppl, S20-24. doi: 10.1038/ng1803



- 531 Hu, N., Strobl-Mazzulla, P., Sauka-Spengler, T., & Bronner, M. E. (2012). DNA  
532 methyltransferase3A as a molecular switch mediating the neural tube-to-  
533 neural crest fate transition. *Genes Dev*, 26(21), 2380-2385. doi:  
534 10.1101/gad.198747.112
- 535 Hu, N., Strobl-Mazzulla, P. H., Simoes-Costa, M., Sanchez-Vasquez, E., &  
536 Bronner, M. E. (2014). DNA methyltransferase 3B regulates duration of  
537 neural crest production via repression of Sox10. *Proc Natl Acad Sci U S*  
538 *A*, 111(50), 17911-17916. doi: 10.1073/pnas.1318408111
- 539 Huang, Y. W., Kuo, C. T., Chen, J. H., Goodfellow, P. J., Huang, T. H., Rader,  
540 J. S., & Uyar, D. S. (2014). Hypermethylation of miR-203 in endometrial  
541 carcinomas. *Gynecol Oncol*, 133(2), 340-345. doi:  
542 10.1016/j.ygyno.2014.02.009
- 543 Ju, S. Y., Chiou, S. H., & Su, Y. (2014). Maintenance of the stemness in  
544 CD44(+) HCT-15 and HCT-116 human colon cancer cells requires miR-  
545 203 suppression. *Stem Cell Res*, 12(1), 86-100. doi:  
546 10.1016/j.scr.2013.09.011
- 547 Kerosuo, L., & Bronner-Fraser, M. (2012). What is bad in cancer is good in the  
548 embryo: importance of EMT in neural crest development. *Semin Cell Dev*  
549 *Biol*, 23(3), 320-332. doi: 10.1016/j.semcdb.2012.03.010
- 550 Kiesslich, T., Pichler, M., & Neureiter, D. (2013). Epigenetic control of epithelial-  
551 mesenchymal-transition in human cancer. *Mol Clin Oncol*, 1(1), 3-11. doi:  
552 10.3892/mco.2012.28
- 553 Kloosterman, W. P., & Plasterk, R. H. (2006). The diverse functions of  
554 microRNAs in animal development and disease. *Dev Cell*, 11(4), 441-  
555 450. doi: 10.1016/j.devcel.2006.09.009
- 556 Kluiver, J., Gibcus, J. H., Hettinga, C., Adema, A., Richter, M. K., Halsema, N., .  
557 . . van den Berg, A. (2012). Rapid generation of microRNA sponges for  
558 microRNA inhibition. *PLoS One*, 7(1), e29275. doi:  
559 10.1371/journal.pone.0029275
- 560 Lardizabal, M. N., Nocito, A. L., Daniele, S. M., Ornella, L. A., Palatnik, J. F., &  
561 Veggi, L. M. (2012). Reference genes for real-time PCR quantification of  
562 microRNAs and messenger RNAs in rat models of hepatotoxicity. *PLoS*  
563 *One*, 7(5), e36323. doi: 10.1371/journal.pone.0036323
- 564 Lohcharoenkal, W., Das Mahapatra, K., Pasquali, L., Crudden, C., Kular, L.,  
565 Akkaya Ulum, Y. Z., . . . Pivarcsi, A. (2018). Genome-Wide Screen for  
566 MicroRNAs Reveals a Role for miR-203 in Melanoma Metastasis. *J*  
567 *Invest Dermatol*, 138(4), 882-892. doi: 10.1016/j.jid.2017.09.049
- 568 Lujambio, A., Calin, G. A., Villanueva, A., Ropero, S., Sanchez-Cespedes, M.,  
569 Blanco, D., . . . Esteller, M. (2008). A microRNA DNA methylation  
570 signature for human cancer metastasis. *Proc Natl Acad Sci U S A*,  
571 105(36), 13556-13561. doi: 10.1073/pnas.0803055105
- 572 Mayor, R., & Theveneau, E. (2013). The neural crest. *Development*, 140(11),  
573 2247-2251. doi: 10.1242/dev.091751
- 574 Miao, L., Xiong, X., Lin, Y., Cheng, Y., Lu, J., Zhang, J., & Cheng, N. (2014).  
575 miR-203 inhibits tumor cell migration and invasion via caveolin-1 in  
576 pancreatic cancer cells. *Oncol Lett*, 7(3), 658-662. doi:  
577 10.3892/ol.2014.1807
- 578 Moes, M., Le Bechec, A., Crespo, I., Laurini, C., Halavatyi, A., Vetter, G., . . .  
579 Friederich, E. (2012). A novel network integrating a miRNA-203/SNAI1



- 580 feedback loop which regulates epithelial to mesenchymal transition.  
581 *PLoS One*, 7(4), e35440. doi: 10.1371/journal.pone.0035440
- 582 Nelson, K. M., & Weiss, G. J. (2008). MicroRNAs and cancer: past, present,  
583 and potential future. *Mol Cancer Ther*, 7(12), 3655-3660. doi:  
584 10.1158/1535-7163.MCT-08-0586
- 585 Sauka-Spengler, T., & Barembaum, M. (2008). Chapter 12 Gain- and  
586 Loss-of-Function Approaches in the Chick Embryo. 87, 237-256. doi:  
587 10.1016/s0091-679x(08)00212-4
- 588 Scarpa, E., & Mayor, R. (2016). Collective cell migration in development. *J Cell*  
589 *Biol*, 212(2), 143-155. doi: 10.1083/jcb.201508047
- 590 Shi, Y., Tan, Y. J., Zeng, D. Z., Qian, F., & Yu, P. W. (2015). miR-203  
591 suppression in gastric carcinoma promotes Slug-mediated cancer  
592 metastasis. *Tumour Biol*. doi: 10.1007/s13277-015-3765-8
- 593 Siegfried, Z., & Simon, I. (2010). DNA methylation and gene expression. *Wiley*  
594 *Interdiscip Rev Syst Biol Med*, 2(3), 362-371. doi: 10.1002/wsbm.64
- 595 Simoes-Costa, M., & Bronner, M. E. (2015). Establishing neural crest identity: a  
596 gene regulatory recipe. *Development*, 142(2), 242-257. doi:  
597 10.1242/dev.105445
- 598 Simoes-Costa, M., & Bronner, M. E. (2016). Reprogramming of avian neural  
599 crest axial identity and cell fate. *Science*, 352(6293), 1570-1573. doi:  
600 10.1126/science.aaf2729
- 601 Strobl-Mazzulla, P. H., & Bronner, M. E. (2012). A PHD12-Snail2 repressive  
602 complex epigenetically mediates neural crest epithelial-to-mesenchymal  
603 transition. *J Cell Biol*, 198(6), 999-1010. doi: 10.1083/jcb.201203098
- 604 Strobl-Mazzulla, P. H., Sauka-Spengler, T., & Bronner-Fraser, M. (2010).  
605 Histone demethylase Jmjd2A regulates neural crest specification. *Dev*  
606 *Cell*, 19(3), 460-468. doi: 10.1016/j.devcel.2010.08.009
- 607 Taneyhill, L. A., Coles, E. G., & Bronner-Fraser, M. (2007). Snail2 directly  
608 represses cadherin6B during epithelial-to-mesenchymal transitions of the  
609 neural crest. *Development*, 134(8), 1481-1490. doi: 10.1242/dev.02834
- 610 Taube, J. H., Malouf, G. G., Lu, E., Sphyris, N., Vijay, V., Ramachandran, P. P.,  
611 . . . Mani, S. A. (2013). Epigenetic silencing of microRNA-203 is required  
612 for EMT and cancer stem cell properties. *Sci Rep*, 3, 2687. doi:  
613 10.1038/srep02687
- 614 Wang, X., Zhao, J., Huang, J., Tang, H., Yu, S., & Chen, Y. (2012). The  
615 regulatory roles of miRNA and methylation on oncogene and tumor  
616 suppressor gene expression in pancreatic cancer cells. *Biochem Biophys*  
617 *Res Commun*, 425(1), 51-57. doi: 10.1016/j.bbrc.2012.07.047
- 618 Weber, B., Stresemann, C., Brueckner, B., & Lyko, F. (2007). Methylation of  
619 human microRNA genes in normal and neoplastic cells. *Cell Cycle*, 6(9),  
620 1001-1005.
- 621 Wellner, U., Schubert, J., Burk, U. C., Schmalhofer, O., Zhu, F., Sonntag, A., . .  
622 . Brabletz, T. (2009). The EMT-activator ZEB1 promotes tumorigenicity  
623 by repressing stemness-inhibiting microRNAs. *Nat Cell Biol*, 11(12),  
624 1487-1495. doi: 10.1038/ncb1998
- 625 Wright, J. A., Richer, J. K., & Goodall, G. J. (2010). microRNAs and EMT in  
626 mammary cells and breast cancer. *J Mammary Gland Biol Neoplasia*,  
627 15(2), 213-223. doi: 10.1007/s10911-010-9183-z
- 628 Xia, H., & Hui, K. M. (2012). MicroRNAs involved in regulating epithelial-  
629 mesenchymal transition and cancer stem cells as molecular targets for

- 630 cancer therapeutics. *Cancer Gene Ther*, 19(11), 723-730. doi:  
631 10.1038/cgt.2012.58
- 632 Xiao, J. N., Yan, T. H., Yu, R. M., Gao, Y., Zeng, W. L., Lu, S. W., . . . Jiang, J.  
633 H. (2017). Long non-coding RNA UCA1 regulates the expression of  
634 Snail2 by miR-203 to promote hepatocellular carcinoma progression. *J*  
635 *Cancer Res Clin Oncol*, 143(6), 981-990. doi: 10.1007/s00432-017-2370-  
636 1
- 637 Zhang, F., Yang, Z., Cao, M., Xu, Y., Li, J., Chen, X., . . . Zeng, Y. (2014). MiR-  
638 203 suppresses tumor growth and invasion and down-regulates MiR-21  
639 expression through repressing Ran in esophageal cancer. *Cancer Lett*,  
640 342(1), 121-129. doi: 10.1016/j.canlet.2013.08.037
- 641 Zhang, J., Zhou, Y., Wu, Y. J., Li, M. J., Wang, R. J., Huang, S. Q., . . . Zhang,  
642 J. (2013). Hyper-methylated miR-203 dysregulates ABL1 and contributes  
643 to the nickel-induced tumorigenesis. *Toxicol Lett*, 223(1), 42-51. doi:  
644 10.1016/j.toxlet.2013.08.007
- 645 Zhang, K., Dai, L., Zhang, B., Xu, X., Shi, J., Fu, L., . . . Bai, Y. (2015). miR-203  
646 Is a Direct Transcriptional Target of E2F1 and Causes G1 Arrest in  
647 Esophageal Cancer Cells. *J Cell Physiol*, 230(4), 903-910. doi:  
648 10.1002/jcp.24821
- 649 Zhang, Z., Zhang, B., Li, W., Fu, L., Fu, L., Zhu, Z., & Dong, J. T. (2011).  
650 Epigenetic Silencing of miR-203 Upregulates SNAI2 and Contributes to  
651 the Invasiveness of Malignant Breast Cancer Cells. *Genes Cancer*, 2(8),  
652 782-791. doi: 10.1177/1947601911429743
- 653 Zhao, S., Yao, D. S., Chen, J. Y., & Ding, N. (2013). Aberrant expression of  
654 miR-20a and miR-203 in cervical cancer. *Asian Pac J Cancer Prev*,  
655 14(4), 2289-2293.
- 656 Zhu, X., Er, K., Mao, C., Yan, Q., Xu, H., Zhang, Y., . . . Shi, H. (2013). miR-203  
657 suppresses tumor growth and angiogenesis by targeting VEGFA in  
658 cervical cancer. *Cell Physiol Biochem*, 32(1), 64-73. doi:  
659 10.1159/000350125  
660
- 661

662

## Supplemental materials

663

664 **Figure S1.** (A) Whole-mount *in situ* hybridization using DIG-labeled LNA probes  
665 (Exiqon) against miR-203 at early chick developmental stages.

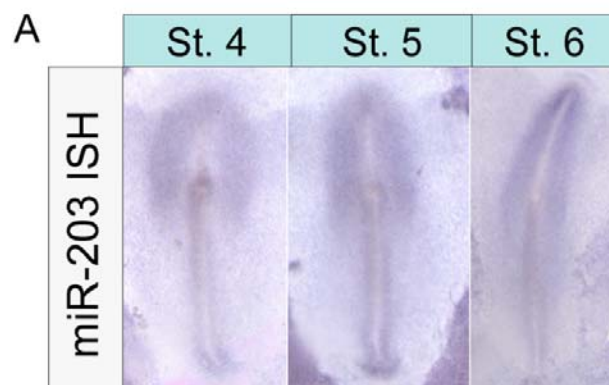

666  
667

668 **Figure S2:** (A) Diagram of electroporation assay for gain-of-function  
 669 experiments. pCAG-miR-203 does not have a fluorescent marker, for this  
 670 reason, was co-electroporated with a fluorescent vector that express GFP  
 671 downstream the CAG promoter. We injected the vectors in the right side of the  
 672 embryos at stage 4. Following injection, embryos were electroporated and  
 673 cultured until stage 9. (B) Electroporation of pCAG-203 vector (right side)  
 674 successfully overexpress a mature miR-203 evidenced by *in situ* hybridization  
 675 using LNA probes. (C) Schematic drawing of the miRNA dual-sensor vector  
 676 (pSdmiR-203) containing two copies of complementary sequences to the  
 677 mature miR-203. (D) Illustration of bilateral electroporation assay to evaluate if  
 678 pCAG-203 express a functional miR-203. (E) Co-electroporation pSdmiR-203  
 679 and the empty pCAG vector (left side) caused that most of the cells are yellow  
 680 because of the expression of both green and red reporters. Whereas, co-  
 681 electroporation pSdmiR-203 and pCAG-203 vector (right side) caused that most  
 682 of the cells are only red, because of the strong repression of the green reporter.  
 683 pCAG, Chick  $\beta$ -actin promoter; d4EGFP<sub>N</sub> nuclear-localized destabilized GFP  
 684 with a half-life of 4 h; mRFP<sub>N</sub>, nuclear-localized monomeric red fluorescent  
 685 protein.

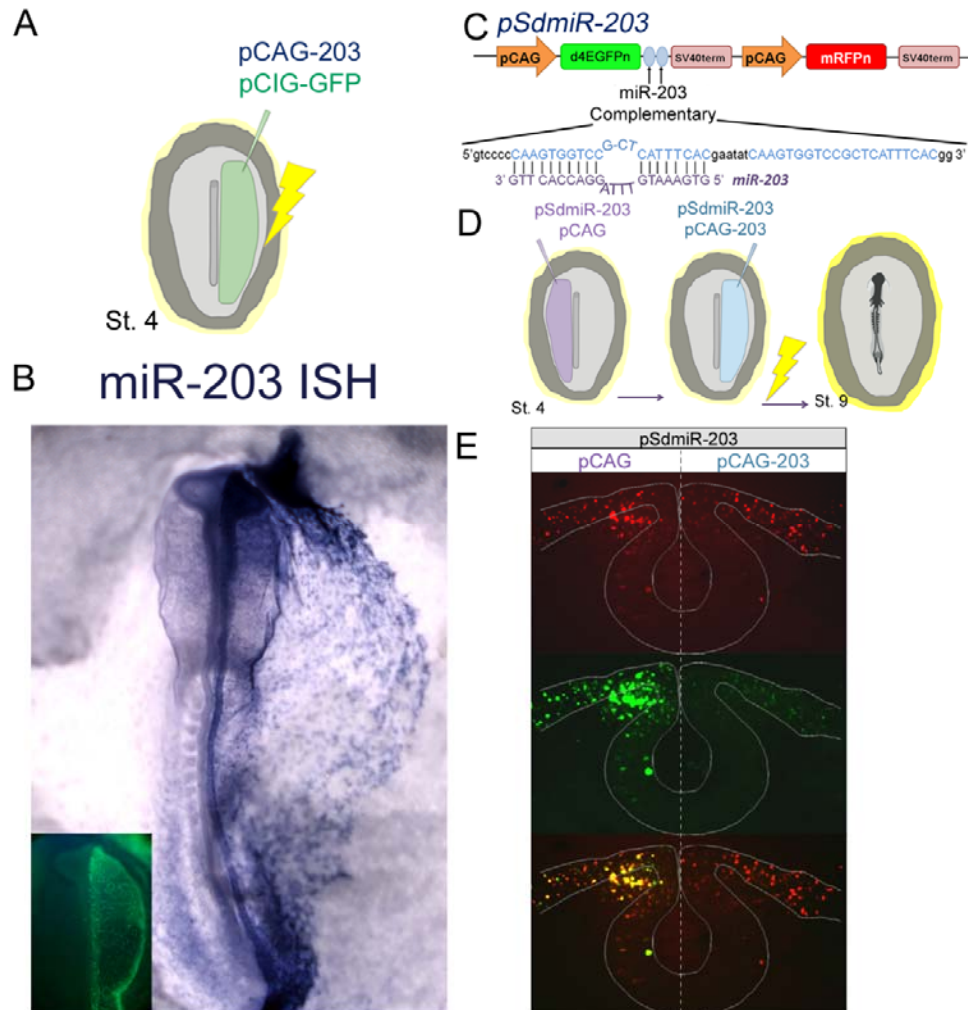

686  
687

688 **Supplementary table 1:** *In silico* analyzes of conserved and poorly conserved  
689 microRNA-binding sites on Snail2 and Phf12 3'UTRs (TargetScan), their known  
690 functions, demonstrated targets, and chick expression (GEISHA).  
691 **GEISHA microRNAs expression in chick development**  
692 [http://geisha.arizona.edu/geisha/quick\\_search.jsp?table=mir](http://geisha.arizona.edu/geisha/quick_search.jsp?table=mir)  
693 **miR-1** (Wei et al., 2014, Wystub et al., 2013, Heidersbach et al., 2013)  
694 **miR-19** (Olive et al., 2009, Mavrakis et al., 2010, Liu et al., 2011)  
695 **miR32-5p/92-3p/367** (Zhu et al., 2013a, Zhu et al., 2015, Sharifi and Salehi,  
696 2016)  
697 **miR-33-5p** (Mi et al., 2016, Wang et al., 2016)  
698 **miR130-3p/301-3p/454-3p** (Leone et al., 2015, Xia et al., 2015, Lv et al., 2016,  
699 Egawa et al., 2016)  
700 **miR-142** (Lu et al., 2013, Borges et al., 2016, Sonda et al., 2013, Dickman et  
701 al., 2017)  
702 **miR-155** (Robertson et al., 2014, Gracias et al., 2013, Forzati et al., 2017)  
703 **miR-181-5p** (Ma et al., 2015, Li et al., 2015, Korhan et al., 2014)  
704 **miR-200b-3p/429-3p** (Gui et al., 2017, Ye et al., 2014, Wu et al., 2016)  
705 **miR-203**(Wei et al., 2010, Yi et al., 2008, Zhang et al., 2011, Shi et al., 2015,  
706 Benaich et al., 2014)  
707 **miR-221-3p/222-3p** (Yan et al., 2016, Takigawa et al., 2016, Wu et al., 2017)  
708 **miR-365-3p** (Wang et al., 2013, Gastaldi et al., 2014)  
709 **miR-455-5p** (Liu et al., 2016, Li et al., 2016, Chai et al., 2015)  
710  
711 ACLOQUE, H., WILKINSON, D. G. & NIETO, M. A. 2008. In situ hybridization  
712 analysis of chick embryos in whole-mount and tissue sections. *Methods*  
713 *Cell Biol*, 87, 169-85.  
714 AHMAD, A., LI, Y., BAO, B., KONG, D. & SARKAR, F. H. 2014. Epigenetic  
715 regulation of miRNA-cancer stem cells nexus by nutraceuticals. *Mol Nutr*  
716 *Food Res*, 58, 79-86.  
717 BENAICH, N., WOODHOUSE, S., GOLDIE, S. J., MISHRA, A., QUIST, S. R. &  
718 WATT, F. M. 2014. Rewiring of an epithelial differentiation factor, miR-  
719 203, to inhibit human squamous cell carcinoma metastasis. *Cell Rep*, 9,  
720 104-17.  
721 BOLDRUP, L., COATES, P. J., WAHLGREN, M., LAURELL, G. & NYLANDER,  
722 K. 2012. Subsite-based alterations in miR-21, miR-125b, and miR-203 in  
723 squamous cell carcinoma of the oral cavity and correlation to important  
724 target proteins. *J Carcinog*, 11, 18.  
725 BOLL, K., REICHE, K., KASACK, K., MORBT, N., KRETZSCHMAR, A. K.,  
726 TOMM, J. M., VERHAEGH, G., SCHALKEN, J., VON BERGEN, M.,  
727 HORN, F. & HACKERMULLER, J. 2013. MiR-130a, miR-203 and miR-  
728 205 jointly repress key oncogenic pathways and are downregulated in  
729 prostate carcinoma. *Oncogene*, 32, 277-85.  
730 BONNOMET, A., BRYASSE, A., TACHSIDIS, A., WALTHAM, M., THOMPSON,  
731 E. W., POLETTE, M. & GILLES, C. 2010. Epithelial-to-mesenchymal  
732 transitions and circulating tumor cells. *J Mammary Gland Biol Neoplasia*,  
733 15, 261-73.  
734 BORGES, E., JR., SETTI, A. S., BRAGA, D. P., GERALDO, M. V., FIGUEIRA,  
735 R. C. & IACONELLI, A., JR. 2016. miR-142-3p as a biomarker of  
736 blastocyst implantation failure - A pilot study. *JBRA Assist Reprod*, 20,  
737 200-205.



- 738 BU, P. & YANG, P. 2014. MicroRNA-203 inhibits malignant melanoma cell  
739 migration by targeting versican. *Exp Ther Med*, 8, 309-315.
- 740 CAO, X., PFAFF, S. L. & GAGE, F. H. 2007. A functional study of miR-124 in  
741 the developing neural tube. *Genes Dev*, 21, 531-6.
- 742 CRANE, J. F. & TRAINOR, P. A. 2006. Neural crest stem and progenitor cells.  
743 *Annu Rev Cell Dev Biol*, 22, 267-86.
- 744 CHAI, J., WANG, S., HAN, D., DONG, W., XIE, C. & GUO, H. 2015. MicroRNA-  
745 455 inhibits proliferation and invasion of colorectal cancer by targeting  
746 RAF proto-oncogene serine/threonine-protein kinase. *Tumour Biol*, 36,  
747 1313-21.
- 748 CHEN, C., RIDZON, D. A., BROOMER, A. J., ZHOU, Z., LEE, D. H., NGUYEN,  
749 J. T., BARBISIN, M., XU, N. L., MAHUVAKAR, V. R., ANDERSEN, M.  
750 R., LAO, K. Q., LIVAK, K. J. & GUEGLER, K. J. 2005. Real-time  
751 quantification of microRNAs by stem-loop RT-PCR. *Nucleic Acids Res*,  
752 33, e179.
- 753 CHEN, H. Y., HAN, Z. B., FAN, J. W., XIA, J., WU, J. Y., QIU, G. Q., TANG, H.  
754 M. & PENG, Z. H. 2012. miR-203 expression predicts outcome after liver  
755 transplantation for hepatocellular carcinoma in cirrhotic liver. *Med Oncol*,  
756 29, 1859-65.
- 757 CHIANG, Y., SONG, Y., WANG, Z., CHEN, Y., YUE, Z., XU, H., XING, C. &  
758 LIU, Z. 2011. Aberrant expression of miR-203 and its clinical significance  
759 in gastric and colorectal cancers. *J Gastrointest Surg*, 15, 63-70.
- 760 CHIM, C. S., WAN, T. S., WONG, K. Y., FUNG, T. K., DREXLER, H. G. &  
761 WONG, K. F. 2011a. Methylation of miR-34a, miR-34b/c, miR-124-1 and  
762 miR-203 in Ph-negative myeloproliferative neoplasms. *J Transl Med*, 9,  
763 197.
- 764 CHIM, C. S., WONG, K. Y., LEUNG, C. Y., CHUNG, L. P., HUI, P. K., CHAN, S.  
765 Y. & YU, L. 2011b. Epigenetic inactivation of the hsa-miR-203 in  
766 haematological malignancies. *J Cell Mol Med*, 15, 2760-7.
- 767 DARNELL, D. K., KAUR, S., STANISLAW, S., KONIECZKA, J. H.,  
768 YATSKIEVYCH, T. A. & ANTIN, P. B. 2006. MicroRNA expression during  
769 chick embryo development. *Dev Dyn*, 235, 3156-65.
- 770 DIAO, Y., GUO, X., JIANG, L., WANG, G., ZHANG, C., WAN, J., JIN, Y. & WU,  
771 Z. 2014. miR-203, a tumor suppressor frequently down-regulated by  
772 promoter hypermethylation in rhabdomyosarcoma. *J Biol Chem*, 289,  
773 529-39.
- 774 DIAZ-LOPEZ, A., MORENO-BUENO, G. & CANO, A. 2014. Role of microRNA  
775 in epithelial to mesenchymal transition and metastasis and clinical  
776 perspectives. *Cancer Manag Res*, 6, 205-16.
- 777 DICKMAN, C. T., LAWSON, J., JABALEE, J., MACLELLAN, S. A., LEPARD, N.  
778 E., BENNEWITH, K. L. & GARNIS, C. 2017. Selective extracellular  
779 vesicle exclusion of miR-142-3p by oral cancer cells promotes both  
780 internal and extracellular malignant phenotypes. *Oncotarget*.
- 781 DING, X., PARK, S. I., MCCAULEY, L. K. & WANG, C. Y. 2013. Signaling  
782 between transforming growth factor beta (TGF-beta) and transcription  
783 factor SNAI2 represses expression of microRNA miR-203 to promote  
784 epithelial-mesenchymal transition and tumor metastasis. *J Biol Chem*,  
785 288, 10241-53.
- 786 DING, X. M. 2014. MicroRNAs: regulators of cancer metastasis and epithelial-  
787 mesenchymal transition (EMT). *Chin J Cancer*, 33, 140-7.

- 788 EGAWA, H., JINGUSHI, K., HIRONO, T., UEDA, Y., KITAE, K., NAKATA, W.,  
789 FUJITA, K., UEMURA, M., NONOMURA, N. & TSUJIKAWA, K. 2016.  
790 The miR-130 family promotes cell migration and invasion in bladder  
791 cancer through FAK and Akt phosphorylation by regulating PTEN. *Sci*  
792 *Rep*, 6, 20574.
- 793 FORZATI, F., DE MARTINO, M., ESPOSITO, F., SEPE, R., PELLECCIA, S.,  
794 MALAPELLE, U., PELLINO, G., ARRA, C. & FUSCO, A. 2017. miR-155  
795 is positively regulated by CBX7 in mouse embryonic fibroblasts and  
796 colon carcinomas, and targets the KRAS oncogene. *BMC Cancer*, 17,  
797 170.
- 798 FRIEDL, P. & GILMOUR, D. 2009. Collective cell migration in morphogenesis,  
799 regeneration and cancer. *Nat Rev Mol Cell Biol*, 10, 445-57.
- 800 FURUTA, M., KOZAKI, K. I., TANAKA, S., ARII, S., IMOTO, I. & INAZAWA, J.  
801 2010. miR-124 and miR-203 are epigenetically silenced tumor-  
802 suppressive microRNAs in hepatocellular carcinoma. *Carcinogenesis*,  
803 31, 766-76.
- 804 GAO, P., WANG, S., JING, F., ZHAN, J. & WANG, Y. 2017. microRNA-203  
805 suppresses invasion of gastric cancer cells by targeting ERK1/2/Slug/ E-  
806 cadherin signaling. *Cancer Biomark*, 19, 11-20.
- 807 GASTALDI, C., BERTERO, T., XU, N., BOURGET-PONZIO, I., LEBRIGAND,  
808 K., FOURRE, S., POPA, A., CARDOT-LECCIA, N., MENEGUZZI, G.,  
809 SONKOLY, E., PIVARCSI, A., MARI, B., BARBRY, P., PONZIO, G. &  
810 REZZONICO, R. 2014. miR-193b/365a cluster controls progression of  
811 epidermal squamous cell carcinoma. *Carcinogenesis*, 35, 1110-20.
- 812 GRACIAS, D. T., STELEKATI, E., HOPE, J. L., BOESTEANU, A. C.,  
813 DOERING, T. A., NORTON, J., MUELLER, Y. M., FRAIETTA, J. A.,  
814 WHERRY, E. J., TURNER, M. & KATSIKIS, P. D. 2013. The microRNA  
815 miR-155 controls CD8(+) T cell responses by regulating interferon  
816 signaling. *Nat Immunol*, 14, 593-602.
- 817 GUI, Z., LUO, F., YANG, Y., SHEN, C., LI, S. & XU, J. 2017. Oridonin inhibition  
818 and miR200b3p/ZEB1 axis in human pancreatic cancer. *Int J Oncol*, 50,  
819 111-120.
- 820 GUTTILLA, I. K., ADAMS, B. D. & WHITE, B. A. 2012. ERalpha, microRNAs,  
821 and the epithelial-mesenchymal transition in breast cancer. *Trends*  
822 *Endocrinol Metab*, 23, 73-82.
- 823 HEIDERSBACH, A., SAXBY, C., CARVER-MOORE, K., HUANG, Y., ANG, Y.  
824 S., DE JONG, P. J., IVEY, K. N. & SRIVASTAVA, D. 2013. microRNA-1  
825 regulates sarcomere formation and suppresses smooth muscle gene  
826 expression in the mammalian heart. *Elife*, 2, e01323.
- 827 HEIMBERG, A. M., COWPER-SAL-LARI, R., SEMON, M., DONOGHUE, P. C.  
828 & PETERSON, K. J. 2010. microRNAs reveal the interrelationships of  
829 hagfish, lampreys, and gnathostomes and the nature of the ancestral  
830 vertebrate. *Proc Natl Acad Sci U S A*, 107, 19379-83.
- 831 HORNSTEIN, E. & SHOMRON, N. 2006. Canalization of development by  
832 microRNAs. *Nat Genet*, 38 Suppl, S20-4.
- 833 HU, N., STROBL-MAZZULLA, P., SAUKA-SPENGLER, T. & BRONNER, M. E.  
834 2012. DNA methyltransferase3A as a molecular switch mediating the  
835 neural tube-to-neural crest fate transition. *Genes Dev*, 26, 2380-5.
- 836 HU, N., STROBL-MAZZULLA, P. H., SIMOES-COSTA, M., SANCHEZ-  
837 VASQUEZ, E. & BRONNER, M. E. 2014. DNA methyltransferase 3B

- 838 regulates duration of neural crest production via repression of Sox10.  
839 *Proc Natl Acad Sci U S A*, 111, 17911-6.
- 840 HUANG, Y. W., KUO, C. T., CHEN, J. H., GOODFELLOW, P. J., HUANG, T.  
841 H., RADER, J. S. & UYAR, D. S. 2014. Hypermethylation of miR-203 in  
842 endometrial carcinomas. *Gynecol Oncol*, 133, 340-5.
- 843 JU, S. Y., CHIOU, S. H. & SU, Y. 2014. Maintenance of the stemness in  
844 CD44(+) HCT-15 and HCT-116 human colon cancer cells requires miR-  
845 203 suppression. *Stem Cell Res*, 12, 86-100.
- 846 KEROSUO, L. & BRONNER-FRASER, M. 2012. What is bad in cancer is good  
847 in the embryo: importance of EMT in neural crest development. *Semin  
848 Cell Dev Biol*, 23, 320-32.
- 849 KIESSLICH, T., PICHLER, M. & NEUREITER, D. 2013. Epigenetic control of  
850 epithelial-mesenchymal-transition in human cancer. *Mol Clin Oncol*, 1, 3-  
851 11.
- 852 KLOOSTERMAN, W. P. & PLASTERK, R. H. 2006. The diverse functions of  
853 microRNAs in animal development and disease. *Dev Cell*, 11, 441-50.
- 854 KLUIVER, J., GIBCUS, J. H., HETTINGA, C., ADEMA, A., RICHTER, M. K.,  
855 HALSEMA, N., SLEZAK-PROCHAZKA, I., DING, Y., KROESEN, B. J. &  
856 VAN DEN BERG, A. 2012. Rapid generation of microRNA sponges for  
857 microRNA inhibition. *PLoS One*, 7, e29275.
- 858 KORHAN, P., ERDAL, E. & ATABEY, N. 2014. MiR-181a-5p is downregulated  
859 in hepatocellular carcinoma and suppresses motility, invasion and  
860 branching-morphogenesis by directly targeting c-Met. *Biochem Biophys  
861 Res Commun*, 450, 1304-12.
- 862 LARDIZABAL, M. N., NOCITO, A. L., DANIELE, S. M., ORNELLA, L. A.,  
863 PALATNIK, J. F. & VEGGI, L. M. 2012. Reference genes for real-time  
864 PCR quantification of microRNAs and messenger RNAs in rat models of  
865 hepatotoxicity. *PLoS One*, 7, e36323.
- 866 LEONE, V., LANGELLA, C., ESPOSITO, F., DE MARTINO, M., DECAUSSIN-  
867 PETRUCCI, M., CHIAPPETTA, G., BIANCO, A. & FUSCO, A. 2015.  
868 miR-130b-3p Upregulation Contributes to the Development of Thyroid  
869 Adenomas Targeting CCDC6 Gene. *Eur Thyroid J*, 4, 213-21.
- 870 LI, Y., KUSCU, C., BANACH, A., ZHANG, Q., PULKOSKI-GROSS, A., KIM, D.,  
871 LIU, J., ROTH, E., LI, E., SHROYER, K. R., DENOYA, P. I., ZHU, X.,  
872 CHEN, L. & CAO, J. 2015. miR-181a-5p Inhibits Cancer Cell Migration  
873 and Angiogenesis via Downregulation of Matrix Metalloproteinase-14.  
874 *Cancer Res*, 75, 2674-85.
- 875 LI, Y. J., PING, C., TANG, J. & ZHANG, W. 2016. MicroRNA-455 suppresses  
876 non-small cell lung cancer through targeting ZEB1. *Cell Biol Int*, 40, 621-  
877 8.
- 878 LIU, J., ZHANG, J., LI, Y., WANG, L., SUI, B. & DAI, D. 2016. MiR-455-5p acts  
879 as a novel tumor suppressor in gastric cancer by down-regulating  
880 RAB18. *Gene*, 592, 308-15.
- 881 LIU, M., WANG, Z., YANG, S., ZHANG, W., HE, S., HU, C., ZHU, H., QUAN, L.,  
882 BAI, J. & XU, N. 2011. TNF-alpha is a novel target of miR-19a. *Int J  
883 Oncol*, 38, 1013-22.
- 884 LOHCHAROENKAL, W., DAS MAHAPATRA, K., PASQUALI, L., CRUDDEN,  
885 C., KULAR, L., AKKAYA ULUM, Y. Z., ZHANG, L., XU LANDEN, N.,  
886 GIRNITA, L., JAGODIC, M., STAHL, M., SONKOLY, E. & PIVARCSI,



- 887 A. 2018. Genome-Wide Screen for MicroRNAs Reveals a Role for miR-  
888 203 in Melanoma Metastasis. *J Invest Dermatol*, 138, 882-892.
- 889 LU, X., LI, X., HE, Q., GAO, J., GAO, Y., LIU, B. & LIU, F. 2013. miR-142-3p  
890 regulates the formation and differentiation of hematopoietic stem cells in  
891 vertebrates. *Cell Res*, 23, 1356-68.
- 892 LUJAMBIO, A., CALIN, G. A., VILLANUEVA, A., ROPERO, S., SANCHEZ-  
893 CESPEDES, M., BLANCO, D., MONTUENGA, L. M., ROSSI, S.,  
894 NICOLOSO, M. S., FALLER, W. J., GALLAGHER, W. M., ECCLES, S.  
895 A., CROCE, C. M. & ESTELLER, M. 2008. A microRNA DNA methylation  
896 signature for human cancer metastasis. *Proc Natl Acad Sci U S A*, 105,  
897 13556-61.
- 898 LV, M., ZHONG, Z., CHI, H., HUANG, M., JIANG, R. & CHEN, J. 2016.  
899 Genome-Wide Screen of miRNAs and Targeting mRNAs Reveals the  
900 Negatively Regulatory Effect of miR-130b-3p on PTEN by PI3K and  
901 Integrin beta1 Signaling Pathways in Bladder Carcinoma. *Int J Mol Sci*,  
902 18.
- 903 MA, Z., QIU, X., WANG, D., LI, Y., ZHANG, B., YUAN, T., WEI, J., ZHAO, B.,  
904 ZHAO, X., LOU, J., JIN, Y. & JIN, Y. 2015. MiR-181a-5p inhibits cell  
905 proliferation and migration by targeting Kras in non-small cell lung cancer  
906 A549 cells. *Acta Biochim Biophys Sin (Shanghai)*, 47, 630-8.
- 907 MAVRAKIS, K. J., WOLFE, A. L., ORICCHIO, E., PALOMERO, T., DE  
908 KEERSMAECKER, K., MCJUNKIN, K., ZUBER, J., JAMES, T., KHAN,  
909 A. A., LESLIE, C. S., PARKER, J. S., PADDISON, P. J., TAM, W.,  
910 FERRANDO, A. & WENDEL, H. G. 2010. Genome-wide RNA-mediated  
911 interference screen identifies miR-19 targets in Notch-induced T-cell  
912 acute lymphoblastic leukaemia. *Nat Cell Biol*, 12, 372-9.
- 913 MAYOR, R. & THEVENEAU, E. 2013. The neural crest. *Development*, 140,  
914 2247-51.
- 915 MI, W., SHI, Q., CHEN, X., WU, T. & HUANG, H. 2016. miR-33a-5p modulates  
916 TNF-alpha-inhibited osteogenic differentiation by targeting SATB2  
917 expression in hBMSCs. *FEBS Lett*, 590, 396-407.
- 918 MIAO, L., XIONG, X., LIN, Y., CHENG, Y., LU, J., ZHANG, J. & CHENG, N.  
919 2014. miR-203 inhibits tumor cell migration and invasion via caveolin-1 in  
920 pancreatic cancer cells. *Oncol Lett*, 7, 658-662.
- 921 MOES, M., LE BECHEC, A., CRESPO, I., LAURINI, C., HALAVATYI, A.,  
922 VETTER, G., DEL SOL, A. & FRIEDERICH, E. 2012. A novel network  
923 integrating a miRNA-203/SNAI1 feedback loop which regulates epithelial  
924 to mesenchymal transition. *PLoS One*, 7, e35440.
- 925 NELSON, K. M. & WEISS, G. J. 2008. MicroRNAs and cancer: past, present,  
926 and potential future. *Mol Cancer Ther*, 7, 3655-60.
- 927 OLIVE, V., BENNETT, M. J., WALKER, J. C., MA, C., JIANG, I., CORDON-  
928 CARDO, C., LI, Q. J., LOWE, S. W., HANNON, G. J. & HE, L. 2009.  
929 miR-19 is a key oncogenic component of mir-17-92. *Genes Dev*, 23,  
930 2839-49.
- 931 ROBERTSON, E. D., WASYLYK, C., YE, T., JUNG, A. C. & WASYLYK, B.  
932 2014. The oncogenic MicroRNA Hsa-miR-155-5p targets the  
933 transcription factor ELK3 and links it to the hypoxia response. *PLoS One*,  
934 9, e113050.
- 935 SAUKA-SPENGLER, T. & BAREMBAUM, M. 2008. Chapter 12 Gain- and  
936 Loss-of-Function Approaches in the Chick Embryo. 87, 237-256.

- 937 SCARPA, E. & MAYOR, R. 2016. Collective cell migration in development. *J*  
938 *Cell Biol*, 212, 143-55.
- 939 SHARIFI, M. & SALEHI, R. 2016. Blockage of miR-92a-3p with locked nucleic  
940 acid induces apoptosis and prevents cell proliferation in human acute  
941 megakaryoblastic leukemia. *Cancer Gene Ther*, 23, 29-35.
- 942 SHI, Y., TAN, Y. J., ZENG, D. Z., QIAN, F. & YU, P. W. 2015. miR-203  
943 suppression in gastric carcinoma promotes Slug-mediated cancer  
944 metastasis. *Tumour Biol*.
- 945 SIEGFRIED, Z. & SIMON, I. 2010. DNA methylation and gene expression.  
946 *Wiley Interdiscip Rev Syst Biol Med*, 2, 362-371.
- 947 SIMOES-COSTA, M. & BRONNER, M. E. 2015. Establishing neural crest  
948 identity: a gene regulatory recipe. *Development*, 142, 242-57.
- 949 SIMOES-COSTA, M. & BRONNER, M. E. 2016. Reprogramming of avian  
950 neural crest axial identity and cell fate. *Science*, 352, 1570-3.
- 951 SONDA, N., SIMONATO, F., PERANZONI, E., CALI, B., BORTOLUZZI, S.,  
952 BISOGNIN, A., WANG, E., MARINCOLA, F. M., NALDINI, L.,  
953 GENTNER, B., TRAUTWEIN, C., SACKETT, S. D., ZANOVELLO, P.,  
954 MOLON, B. & BRONTE, V. 2013. miR-142-3p prevents macrophage  
955 differentiation during cancer-induced myelopoiesis. *Immunity*, 38, 1236-  
956 49.
- 957 STROBL-MAZZULLA, P. H. & BRONNER, M. E. 2012. A PHD12-Snail2  
958 repressive complex epigenetically mediates neural crest epithelial-to-  
959 mesenchymal transition. *J Cell Biol*, 198, 999-1010.
- 960 STROBL-MAZZULLA, P. H., SAUKA-SPENGLER, T. & BRONNER-FRASER,  
961 M. 2010. Histone demethylase Jmjd2A regulates neural crest  
962 specification. *Dev Cell*, 19, 460-8.
- 963 TAKIGAWA, S., CHEN, A., WAN, Q., NA, S., SUDO, A., YOKOTA, H. &  
964 HAMAMURA, K. 2016. Role of miR-222-3p in c-Src-Mediated Regulation  
965 of Osteoclastogenesis. *Int J Mol Sci*, 17, 240.
- 966 TANEYHILL, L. A., COLES, E. G. & BRONNER-FRASER, M. 2007. Snail2  
967 directly represses cadherin6B during epithelial-to-mesenchymal  
968 transitions of the neural crest. *Development*, 134, 1481-90.
- 969 TAUBE, J. H., MALOUF, G. G., LU, E., SPHYRIS, N., VIJAY, V.,  
970 RAMACHANDRAN, P. P., UENO, K. R., GAUR, S., NICOLOSO, M. S.,  
971 ROSSI, S., HERSCHKOWITZ, J. I., ROSEN, J. M., ISSA, J. P., CALIN,  
972 G. A., CHANG, J. T. & MANI, S. A. 2013. Epigenetic silencing of  
973 microRNA-203 is required for EMT and cancer stem cell properties. *Sci*  
974 *Rep*, 3, 2687.
- 975 WANG, H., SUN, Z., WANG, Y., HU, Z., ZHOU, H., ZHANG, L., HONG, B.,  
976 ZHANG, S. & CAO, X. 2016. miR-33-5p, a novel mechano-sensitive  
977 microRNA promotes osteoblast differentiation by targeting Hmga2. *Sci*  
978 *Rep*, 6, 23170.
- 979 WANG, J., WANG, X., WU, G., HOU, D. & HU, Q. 2013. MiR-365b-3p, down-  
980 regulated in retinoblastoma, regulates cell cycle progression and  
981 apoptosis of human retinoblastoma cells by targeting PAX6. *FEBS Lett*,  
982 587, 1779-86.
- 983 WANG, X., ZHAO, J., HUANG, J., TANG, H., YU, S. & CHEN, Y. 2012. The  
984 regulatory roles of miRNA and methylation on oncogene and tumor  
985 suppressor gene expression in pancreatic cancer cells. *Biochem Biophys*  
986 *Res Commun*, 425, 51-7.

- 987 WEBER, B., STRESEMANN, C., BRUECKNER, B. & LYKO, F. 2007.  
988 Methylation of human microRNA genes in normal and neoplastic cells.  
989 *Cell Cycle*, 6, 1001-5.
- 990 WEI, T., ORFANIDIS, K., XU, N., JANSON, P., STAHLE, M., PIVARCSI, A. &  
991 SONKOLY, E. 2010. The expression of microRNA-203 during human  
992 skin morphogenesis. *Exp Dermatol*, 19, 854-6.
- 993 WEI, Y., PENG, S., WU, M., SACHIDANANDAM, R., TU, Z., ZHANG, S.,  
994 FALCE, C., SOBIE, E. A., LEBECHE, D. & ZHAO, Y. 2014. Multifaceted  
995 roles of miR-1s in repressing the fetal gene program in the heart. *Cell*  
996 *Res*, 24, 278-92.
- 997 WELLNER, U., SCHUBERT, J., BURK, U. C., SCHMALHOFER, O., ZHU, F.,  
998 SONNTAG, A., WALDVOGEL, B., VANNIER, C., DARLING, D., ZUR  
999 HAUSEN, A., BRUNTON, V. G., MORTON, J., SANSOM, O.,  
1000 SCHULER, J., STEMMLER, M. P., HERZBERGER, C., HOPT, U.,  
1001 KECK, T., BRABLETZ, S. & BRABLETZ, T. 2009. The EMT-activator  
1002 ZEB1 promotes tumorigenicity by repressing stemness-inhibiting  
1003 microRNAs. *Nat Cell Biol*, 11, 1487-95.
- 1004 WRIGHT, J. A., RICHER, J. K. & GOODALL, G. J. 2010. microRNAs and EMT  
1005 in mammary cells and breast cancer. *J Mammary Gland Biol Neoplasia*,  
1006 15, 213-23.
- 1007 WU, J., CUI, H., ZHU, Z. & WANG, L. 2016. MicroRNA-200b-3p suppresses  
1008 epithelial-mesenchymal transition and inhibits tumor growth of glioma  
1009 through down-regulation of ERK5. *Biochem Biophys Res Commun*, 478,  
1010 1158-64.
- 1011 WU, Q., REN, X., ZHANG, Y., FU, X., LI, Y., PENG, Y., XIAO, Q., LI, T.,  
1012 OUYANG, C., HU, Y., ZHANG, Y., ZHOU, W., YAN, W., GUO, K., LI, W.,  
1013 HU, Y., YANG, X., SHU, G., XUE, H., WEI, Z., LUO, Y. & YIN, G. 2017.  
1014 MiR-221-3p targets ARF4 and inhibits the proliferation and migration of  
1015 epithelial ovarian cancer cells. *Biochem Biophys Res Commun*.
- 1016 WYSTUB, K., BESSER, J., BACHMANN, A., BOETTGER, T. & BRAUN, T.  
1017 2013. miR-1/133a clusters cooperatively specify the cardiomyogenic  
1018 lineage by adjustment of myocardin levels during embryonic heart  
1019 development. *PLoS Genet*, 9, e1003793.
- 1020 XIA, H. & HUI, K. M. 2012. MicroRNAs involved in regulating epithelial-  
1021 mesenchymal transition and cancer stem cells as molecular targets for  
1022 cancer therapeutics. *Cancer Gene Ther*, 19, 723-30.
- 1023 XIA, X., ZHANG, K., CEN, G., JIANG, T., CAO, J., HUANG, K., HUANG, C.,  
1024 ZHAO, Q. & QIU, Z. 2015. MicroRNA-301a-3p promotes pancreatic  
1025 cancer progression via negative regulation of SMAD4. *Oncotarget*, 6,  
1026 21046-63.
- 1027 XIAO, J. N., YAN, T. H., YU, R. M., GAO, Y., ZENG, W. L., LU, S. W., QUE, H.  
1028 X., LIU, Z. P. & JIANG, J. H. 2017. Long non-coding RNA UCA1  
1029 regulates the expression of Snail2 by miR-203 to promote hepatocellular  
1030 carcinoma progression. *J Cancer Res Clin Oncol*, 143, 981-990.
- 1031 YAN, J., GUO, D., YANG, S., SUN, H., WU, B. & ZHOU, D. 2016. Inhibition of  
1032 miR-222-3p activity promoted osteogenic differentiation of hBMSCs by  
1033 regulating Smad5-RUNX2 signal axis. *Biochem Biophys Res Commun*,  
1034 470, 498-503.

- 1035 YE, F., TANG, H., LIU, Q., XIE, X., WU, M., LIU, X., CHEN, B. & XIE, X. 2014.  
1036 miR-200b as a prognostic factor in breast cancer targets multiple  
1037 members of RAB family. *J Transl Med*, 12, 17.
- 1038 YI, R., POY, M. N., STOFFEL, M. & FUCHS, E. 2008. A skin microRNA  
1039 promotes differentiation by repressing 'stemness'. *Nature*, 452, 225-9.
- 1040 ZHANG, F., YANG, Z., CAO, M., XU, Y., LI, J., CHEN, X., GAO, Z., XIN, J.,  
1041 ZHOU, S., ZHOU, Z., YANG, Y., SHENG, W. & ZENG, Y. 2014. MiR-203  
1042 suppresses tumor growth and invasion and down-regulates MiR-21  
1043 expression through repressing Ran in esophageal cancer. *Cancer Lett*,  
1044 342, 121-9.
- 1045 ZHANG, J., ZHOU, Y., WU, Y. J., LI, M. J., WANG, R. J., HUANG, S. Q., GAO,  
1046 R. R., MA, L., SHI, H. J. & ZHANG, J. 2013. Hyper-methylated miR-203  
1047 dysregulates ABL1 and contributes to the nickel-induced tumorigenesis.  
1048 *Toxicol Lett*, 223, 42-51.
- 1049 ZHANG, K., DAI, L., ZHANG, B., XU, X., SHI, J., FU, L., CHEN, X., LI, J. & BAI,  
1050 Y. 2015. miR-203 Is a Direct Transcriptional Target of E2F1 and Causes  
1051 G1 Arrest in Esophageal Cancer Cells. *J Cell Physiol*, 230, 903-10.
- 1052 ZHANG, Z., ZHANG, B., LI, W., FU, L., FU, L., ZHU, Z. & DONG, J. T. 2011.  
1053 Epigenetic Silencing of miR-203 Upregulates SNAI2 and Contributes to  
1054 the Invasiveness of Malignant Breast Cancer Cells. *Genes Cancer*, 2,  
1055 782-91.
- 1056 ZHAO, S., YAO, D. S., CHEN, J. Y. & DING, N. 2013. Aberrant expression of  
1057 miR-20a and miR-203 in cervical cancer. *Asian Pac J Cancer Prev*, 14,  
1058 2289-93.
- 1059 ZHU, G., CHAI, J., MA, L., DUAN, H. & ZHANG, H. 2013a. Downregulated  
1060 microRNA-32 expression induced by high glucose inhibits cell cycle  
1061 progression via PTEN upregulation and Akt inactivation in bone marrow-  
1062 derived mesenchymal stem cells. *Biochem Biophys Res Commun*, 433,  
1063 526-31.
- 1064 ZHU, X., ER, K., MAO, C., YAN, Q., XU, H., ZHANG, Y., ZHU, J., CUI, F.,  
1065 ZHAO, W. & SHI, H. 2013b. miR-203 suppresses tumor growth and  
1066 angiogenesis by targeting VEGFA in cervical cancer. *Cell Physiol*  
1067 *Biochem*, 32, 64-73.
- 1068 ZHU, Z., XU, Y., ZHAO, J., LIU, Q., FENG, W., FAN, J. & WANG, P. 2015. miR-  
1069 367 promotes epithelial-to-mesenchymal transition and invasion of  
1070 pancreatic ductal adenocarcinoma cells by targeting the Smad7-TGF-  
1071 beta signalling pathway. *Br J Cancer*, 112, 1367-75.
- 1072



|             |                            | Conserved sites |         |         | Poorly conserved sites |         |         |       | Pct     | Known function                              | Known Target Gene                                                                                                                    | Reference                                                                                | Expression (GEISHA) Stages 3-25                                                                                          |
|-------------|----------------------------|-----------------|---------|---------|------------------------|---------|---------|-------|---------|---------------------------------------------|--------------------------------------------------------------------------------------------------------------------------------------|------------------------------------------------------------------------------------------|--------------------------------------------------------------------------------------------------------------------------|
|             |                            | 8mer            | 7mer-m8 | 7mer-1A | 8mer                   | 7mer-m8 | 7mer-1A | 6mers |         |                                             |                                                                                                                                      |                                                                                          |                                                                                                                          |
| Phf12       | miR-19-3p                  | 1               | 0       | 0       | 0                      | 0       | 0       | 1     | 0,85    | Oncogene                                    | Pten,Bim,TNF- $\alpha$                                                                                                               | Olive et al. 2009; Mavrakis et al. 2010; Liu et al. 2011                                 | Broadly expressed but at much reduced levels in the heart                                                                |
|             | miR-130-3p /301-3p /454-3p | 1               | 0       | 0       | 0                      | 0       | 0       | 0     | 0,77    | Oncogene                                    | Coiled-coil domain-containing protein 6 (CCDC6), Smad4, Pten                                                                         | Leone et al. 2015; Xia et al. 2015; Egawa et al. 2016; Lv et al. 2016                    | Hindbrain, spinal cord, widespread expression after stage 21 except in heart                                             |
|             | miR-365-3p                 | 0               | 1       | 0       | 0                      | 0       | 0       | 1     | 0,41    | Tumor suppressor                            | KRAS, MAX, PAX6                                                                                                                      | Wang et al. 2013; Gastaldi et al. 2014                                                   | No expression detected until stage 14, extraembryonic, notochord, surface ectoderm, widespread expression after stage 19 |
|             | miR-142-3p                 | 0               | 0       | 1       | 0                      | 0       | 0       | 0     | 0,4     | Tumor suppressor, hematopoietic development | Interferon regulatory factor 7 ( Irf7 ), interleukin 6 signal transducer (IL6st), transforming growth factor beta receptor 1(TGFBR1) | Lu et al. 2013; Sonda et al. 2013; Borges et al. 2016; Dickman et al. 2017               | No expression detected until stage 20, atria, sinus venosus                                                              |
|             | miR-455-5p                 | 0               | 0       | 1       | 0                      | 0       | 0       | 0     | 0,38    | Tumor suppressor                            | RAB18, ZEB1, RA F proto-oncogene serine/threonine-protein kinase (RAF1)                                                              | Chai et al. 2015; Li et al. 2016; Liu et al. 2016                                        | Unknown                                                                                                                  |
|             | miR-221-3p /222-3p         | 0               | 0       | 1       | 0                      | 0       | 0       | 0     | 0,36    | Osteoblasts/ osteocytes develop             | RUNX2, Smad5, tartrate-resistant acid phosphatase (TRAP), ADP-ribosylation factor 4(ARF4)                                            | Takigawa et al. 2016; Yan et al. 2016; Wu et al. 2017                                    | No expression detected until stage 14, low level ubiquitous from stage 16-25                                             |
|             | miR-33-5p                  | 1               | 0       | 0       | 0                      | 0       | 0       | 0     | 0,32    |                                             |                                                                                                                                      |                                                                                          |                                                                                                                          |
|             | miR-203                    | 0               | 1       | 0       | 0                      | 0       | 0       | 0     | 0,31    |                                             |                                                                                                                                      |                                                                                          |                                                                                                                          |
| miR-7467-3p | 0                          | 0               | 1       | 0       | 0                      | 0       | 0       | 0,24  | Unknown | Unknown                                     | Unknown                                                                                                                              | Unknown                                                                                  |                                                                                                                          |
| Snail2      | miR-1-3p/206               | 0               | 1       | 0       | 0                      | 1       | 0       | 0     | 0,72    | Cardiovascular development                  | ER $\beta$ 1, myocardin, telokin                                                                                                     | Heidersbach et al. 2013; Wystub et al. 2013; Wei et al. 2014                             | Atria, heart, myocardium, myotome, somites, ventricles                                                                   |
|             | miR-181-5p                 | 0               | 0       | 1       | 0                      | 1       | 0       | 1     | 0,47    | Tumor suppressor                            | KRAS,matrix metalloproteinase MMP-14, c-Met                                                                                          | Korhan et al. 2014; Li et al. 2015; Ma et al. 2015                                       | Ubiquitous                                                                                                               |
|             | miR-200b-3p /429-3p        | 0               | 1       | 0       | 0                      | 0       | 0       | 1     | 0,43    | Tumor suppressor                            | Zeb1, multiple members of RAB family, extracellular-regulated protein kinase 5 (ERK5)                                                | Ye et al. 2014; Wu et al. 2016; Gui et al. 2017                                          | Surface ectoderm from stage 13-18, diverse expression before stage 20                                                    |
|             | miR-203                    | 1               | 0       | 0       | 0                      | 0       | 0       | 1     | 0,38    | Skin development, tumor suppressor          | p63, Snail2, LIM and SH3 domain protein 1 (LASP1)                                                                                    | Yi et al. 2008; Wei et al. 2010; Zhang et al. 2011; Benaich et al. 2014; Shi et al. 2015 | Ubiquitous after stage 15, no expression detected at stage 5                                                             |
|             | miR-33-5p                  | 0               | 0       | 1       | 0                      | 1       | 0       | 1     | 0,31    | Osteoblasts/ osteocytes develop             | Special AT-rich sequence-binding protein 2 (SATB2), high-mobility group AT-hook 2(HMGA2)                                             | Mi et al. 2016; Wang et al. 2016                                                         | No expression detected until stage 21, amnion, atria, extraembryonic                                                     |
|             | miR-155                    | 0               | 0       | 0       | 0                      | 1       | 0       | 0     | 0,23    | Oncogene                                    | ELK3 (ETS Transcription Factor), several mRNAs                                                                                       | Gracias et al. 2013; Robertson et al. 2014; Forzati et al. 2017                          | No expression detected stage 3-24                                                                                        |
|             | miR-32-5p /92-3p/367       | 0               | 0       | 0       | 0                      | 0       | 1       | 0     | 0,22    | Oncogene                                    | Pten, Smad7, estrogen-related receptor $\beta$ (ER $\beta$ 1)                                                                        | Zhu et al. 2013; Zhu et al. 2015; Sharifi and Salehi 2016                                | Neural Plate/Tube, spinal cord, widespread expression                                                                    |

1074 **Supplementary table 2:** Results obtained with the Jaspar 2018 (<http://jaspar.genereg.net/>)  
 1075 for SNAIL2 binding site in the tentative promoter of miR-203. High binding sites (>9) are  
 1076 mapped in figure 2A. We also show the sequence analyzed in Jaspar 2018.  
 1077  
 1078

| Matrix ID | Name  | Score   | Relative score | Sequence ID                | Start | End   | Strand | Predicted sequence |
|-----------|-------|---------|----------------|----------------------------|-------|-------|--------|--------------------|
| MA0745.1  | SNAI2 | 12,6931 | 0.999707221414 | miR_203_tentative_promoter | -1162 | -1153 | +      | AACAGGTGC          |
| MA0745.1  | SNAI2 | 9,71729 | 0.94034684341  | miR_203_tentative_promoter | -1552 | -1543 | +      | GGCAGGTAC          |
| MA0745.1  | SNAI2 | 8,48966 | 0.915858769456 | miR_203_tentative_promoter | -1089 | -1080 | -      | CACAGGTTG          |
| MA0745.1  | SNAI2 | 7,98092 | 0.905710714071 | miR_203_tentative_promoter | -1273 | -1264 | -      | ATCAGGTTG          |
| MA0745.1  | SNAI2 | 4,63965 | 0.839061031445 | miR_203_tentative_promoter | -1599 | -1590 | -      | TGCATGTTT          |
| MA0745.1  | SNAI2 | 3,94346 | 0.825173896668 | miR_203_tentative_promoter | -1527 | -1518 | +      | TCAAGGTGT          |
| MA0745.1  | SNAI2 | 3,5435  | 0.817195747557 | miR_203_tentative_promoter | -1199 | -1190 | -      | TGAGGTTG           |
| MA0745.1  | SNAI2 | 3,51455 | 0.816618237138 | miR_203_tentative_promoter | -1293 | -1284 | +      | AGAAAGTGA          |
| MA0745.1  | SNAI2 | 3,24005 | 0.811142584031 | miR_203_tentative_promoter | -1082 | -1071 | +      | TGCCAGTGC          |

>miR\_203\_tentative\_promoter Chr 5:50767590-50768212

AGGACTGGCTTGAGTTGCCCTATATATTTATAAAGAGCCAAAGATCATAGGATCTGGAGTGCCAGAATTCATACACAGCATATACAGCTCTTTAAACATGCAAAACACTCTATTAAACATGA  
 GTGAAGCCTCATAAGATGAGGCAGGTACGCATTATCTCTCCCTCAAGGTGTGGCGAAGTGACTTGGTGAAGGCCTGAGGCTGAGTCGCTGGCAGAGCAGGGCCGACTATCCCAACTT  
 TCCTACACCACACAGGCTGCCCGTCCAGCATGGCAAAGCGTGAAGGCCCTCCGTCACCCAGCAGCAGGGCTCCGAAAGCCAGTGGTTGTGTTTCATTCTCTCTATAGACAAAG  
 AGGGTGAAATATTAATGGAAGAAAGTCAAATTCAGAGAAAGTGACTCCCGGCAAGCAACCTGATTTCTGGAAGTTCATGAAATCATACAATTTGTTGAGTTGGAAGGGACCCCTAAAGG  
 CCATCCAGTCCAACCTCCATGCAATAAGTAGGGACTCCACGGCTCCAACAGGTGTCAGAGCCCGTCCAGCCTGACCTTGGCTGTCTAAGGACAGGGCACCCACCACATCTCTGGGCA  
 ACCTGTGCCAGTGCCTC

1079  
 1080 **Supplementary table 3:** Complete list of utilized primers, LNA probe, and morpholinos  
 1081

| Gene/Direction                    | Sequence                                           |
|-----------------------------------|----------------------------------------------------|
| <b>LNA Probe</b>                  |                                                    |
| dre-miR-203a(gga-miR-203)         | CAAGTGGTCTAAACATTTAC                               |
| <b>RT-qPCR Primer Sequences</b>   |                                                    |
| stem-loop-gga-miR-203             | GTCTCCTCTGGTGCAGGGTCCGAGGTATTCGCACCAGAGGAGACCAAGTG |
| stem-loop-gga-miR-16              | GTCTCCTCTGGTGCAGGGTCCGAGGTATTCGCACCAGAGGAGACCAAGTG |
| qPCR-gga-miR-203 Fwd              | CCGGCGTGAAATGTTTAGG                                |
| qPCR-gga-miR-16 Fwd               | CGCCGCTAGCAGCACGTA                                 |
| qPCR-gga-miR-universal Rev        | GAGGTATTCGCACCAGAGGA                               |
| qPCR-Snai2 Fwd                    | GCCAACTACAGCGAACTGG                                |
| qPCR-Snai2 Rev                    | CGGAGAGAGGTCATTGGGTA                               |
| qPCR-Phf12-Fwd                    | CTGAGGAACCCTGCAGAAG                                |
| qPCR-Phf12-Rev                    | AGAGTCCCAAAGCGAAGTCA                               |
| qPCR-HPRT1-Fwd                    | TGGTGAAAGTGCCAGTTTG                                |
| qPCR-HPRT1-Rev                    | TCATTGTAGTCGAGGGCGTATC                             |
| <b>Bisulfite Primer Sequences</b> |                                                    |
| Proximal region                   |                                                    |
| P-miR-203 Fwd                     | AGGTAGTTTGGAAAAATTGGTTT                            |
| P-miR_203 Rev                     | CTCCTTTAAAAACATTACAACCC                            |
| PN-miR-203 Fwd                    | AAGTTTTGTTGTTGTTGTTATTTT                           |
| PN-miR-203 Rev                    | TAAACTATTA AAAACCACTACACCA                         |
| Distal region                     |                                                    |

|                                |                                                             |
|--------------------------------|-------------------------------------------------------------|
| D-miR-203 Fwd                  | TTTATATTTGTTGAGGGGAAGG                                      |
| D-miR-203 Rev                  | TTTCCAAACTACCTTCTCCCTA                                      |
| DN-miR-203 Fwd                 | TTGTGTGAGGTTGGTAGTTAGG                                      |
| DN-miR-203 Rev                 | ATCATCATCATCTAAAACAACCC                                     |
| <b>pCAG-miR-203 cloning</b>    |                                                             |
| XhoI-gga-miR-203 Fwd           | AAACTCGAGCTCCGAGCTGAGAAGAATGG                               |
| EcoRV-gga-miR-203 Rev          | AAAGATATCCGCGCACTACAAGCCTATTT                               |
| <b>Sponge cloning</b>          |                                                             |
| miR-203 sponge Fwd             | gtcccCAAGTGGTCCGCTCATTTTACgaatatCAAGTGGTCCGCTCATTTACg<br>g  |
| miR-203 sponge Rev             | gacccGTGAAATGAGCGGACCACTTGatattcGTGAAATGAGCGGACCACTT<br>Ggg |
| Scramble sponge Fwd            | gtcccATCTAGCTGATCTAATCGAACaatatATCTAGCTGATCTAATCGAACgg      |
| Scramble sponge Rev            | gacccGTTTCGATTAGATCAGCTAGATatattGTTTCGATTAGATCAGCTAGATgg    |
| <b>pUTRs cloning</b>           |                                                             |
| Snail2-3'UTR Fwd               | ACGCGTGTGCATGCAGTCAATGTTTAC                                 |
| Snail2-3'UTR Rev               | GCTAGCTTTCACTTCACGCTTTCTTC                                  |
| mutSnail2-3'UTR SITIO A<br>Fwd | ATGCATGAGACCCGCAGTAGATCTAAACG                               |
| mutSnail2-3'UTR SITIO A<br>Rev | GCGGGTCTCATGCATGGCATCTTTCCCC                                |
| mutSnail2-3'UTR SITIO B<br>Fwd | CAAGCGACCCGCACCAAAGAAACAGTATTTTAATGG                        |
| mutSnail2-3'UTR SITIO B<br>Rev | GGTGCGGGTCGCTTGGCAGGAATGTATTAGTAAC                          |
| Phf12-3'UTR SanDI Fwd          | AAAGGGTCCCGAATTTGGAGGAAGGGAGCT                              |
| Phf12-3'UTR Rev                | GCTAGCTACAGTGGAGCTAGCTGGCC                                  |
| mutPhf12-3'UTR Rev             | AAAACGCGTGCTGCTCTCGCTGCAGTTTTCTTTTAAAAGCGGGTCTATAG          |
| <b>Morpholinos Sequences</b>   |                                                             |
| DNMT3A MO                      | TGGGTGTGCTACTGCTTTCCACCAT                                   |
| DNMT3B MO                      | CGAGGCTCGTTACCATGCTCATCGC                                   |
| SNAIL2 MO                      | TCTTGACCAG GAAGGAGC                                         |

1082  
1083  
1084
